# Supplementary material for: Recommendations on benchmarks for chemical transport model applications in China – Part 2: Ozone and Uncertainty Analysis
Source: Copernicus journal article supplement (doi:10.5194/egusphere-2024-2199), 2024-09-02
Supplement: Supplementary file 1 [file egusphere-2024-2199-supplement.pdf]

*Supplement of*

**Recommendations on benchmarks for chemical transport model applications in China – Part 2: Ozone and Uncertainty Analysis**

Ling Huang<sup>1</sup>, Xinxin Zhang<sup>1</sup>, Chris Emery<sup>2</sup>, Qing Mu<sup>3</sup>, Greg Yarwood<sup>2</sup>, Hehe Zhai<sup>1</sup>, Zhixu Sun<sup>1</sup>, Shuhui Xue<sup>1</sup>, Yangjun Wang<sup>1</sup>, Joshua S Fu<sup>4</sup>, Li Li<sup>1\*</sup>

<sup>1</sup>School of Environmental and Chemical Engineering, Shanghai University, Shanghai, 200444, China

<sup>2</sup>Ramboll, Novato, California, 95995, USA

<sup>3</sup>Department of Health and Environmental Sciences, Xi'an Jiaotong-Liverpool University, Suzhou, China

<sup>4</sup>Department of Civil and Environmental Engineering, University of Tennessee, Knoxville, TN 37996, USA

*Correspondence to:* Li Li ([lily@shu.edu.cn](mailto:lily@shu.edu.cn))

**Contents**

**Table S1** Summary of studies complied in this work

**Table S2** List of statistical metrics used in studies complied in this work

**Table S3** Definition of regions

**Table S4** Definition of statistical metrics used in more than ten studies complied in this work

**Table S5** Estimated uncertainties in emissions, dry deposition velocities and boundary concentrations

**Table S6** Quantile values of selected statistical metrics for O<sub>3</sub>, 1-hr max O<sub>3</sub> and 8-hr max O<sub>3</sub>

**Figure S1** First-order sensitivities of MDA8 O<sub>3</sub> to (a) AVOCs, (b) BVOCs, (c) ANO<sub>x</sub>, (d) SNO<sub>x</sub>, (e) O<sub>3</sub> BCs and (f) Dry Deposition in µg/m<sup>3</sup>. Results are averages over all days in June 2021

**Table S1** Summary of studies compiled in this work

| Reference              | Model     | O <sub>3</sub> evaluated | Seasons                         | Regions                                 |
|------------------------|-----------|--------------------------|---------------------------------|-----------------------------------------|
| An et al. (2013)       | CMAQ      | O <sub>3</sub>           | Annual                          | BTH, Northeast, YRD                     |
| Ansari et al. (2019)   | WRF-Chem  | O <sub>3</sub>           | Fall                            | BTH, NCP                                |
| Bei et al. (2016)      | WRF-Chem  | O <sub>3</sub>           | Winter                          | PRD                                     |
| Bei et al. (2018)      | WRF-Chem  | O <sub>3</sub>           | Summer                          | BTH                                     |
| Bouarar et al. (2019)  | WRF-Chem  | O <sub>3</sub>           | Winter, Summer                  | BTH, YRD, PRD                           |
| Campbell et al. (2017) | WRF-Chem  | O <sub>3</sub>           | Spring                          | PRD, Southeast                          |
| Chang et al. (2021)    | WRF-Chem  | O <sub>3</sub>           | Spring                          | PRD                                     |
| Che et al. (2011)      | CMAQ      | O <sub>3</sub>           | Fall                            | PRD                                     |
| Chen et al. (2016)     | WRF-Chem  | O <sub>3</sub>           | Fall                            | BTH                                     |
| Chen et al. (2019)     | WRF-Chem  | O <sub>3</sub>           | Fall                            | PRD                                     |
| Chen et al. (2020)     | CMAQ      | O <sub>3</sub>           | Annual                          | BTH+NCP+YRD+Central China+Northeast     |
| Chen et al. (2021a)    | WRF-Chem  | O <sub>3</sub>           | Winter                          | BTH                                     |
| Chen et al. (2021b)    | CMAQ      | 8-hr max O <sub>3</sub>  | Summer                          | BTH                                     |
| Chen et al. (2021c)    | CMAQ      | O <sub>3</sub>           | Fall                            | BTH, YRD, PRD,<br>BTH+YRD+PRD+Southeast |
| Cheng et al. (2019)    | CMAQ      | O <sub>3</sub>           | Annual                          | BTH                                     |
| Cui et al. (2015)      | WRF-Chem  | 8-hr max O <sub>3</sub>  | Annual                          | PRD                                     |
| Dang and Liao (2019)   | GEOS-Chem | O <sub>3</sub>           | Winter, Spring, Summer,<br>Fall | Entire China                            |

| Reference            | Model      | O <sub>3</sub> evaluated | Seasons                         | Regions                       |
|----------------------|------------|--------------------------|---------------------------------|-------------------------------|
| Dang et al. (2021)   | GEOS-Chem  | 8-hr max O <sub>3</sub>  | Summer                          | YRD, NCP                      |
| Ding et al. (2022)   | CMAQ       | O <sub>3</sub>           | Winter, Spring, Summer,<br>Fall | BTH, Central China, NCP       |
| Dong et al. (2013)   | CMAQ       | O <sub>3</sub>           | Summer                          | YRD                           |
| Duan et al. (2021)   | CMAQ       | 8-hr max O <sub>3</sub>  | Annual                          | BTH                           |
| Fan et al. (2014)    | CMAQ       | O <sub>3</sub>           | Fall                            | PRD                           |
| Fan et al. (2015)    | CMAQ       | O <sub>3</sub>           | Spring                          | PRD                           |
| Fang et al. (2021)   | CMAQ, CAMx | O <sub>3</sub>           | Fall                            | PRD                           |
| Feng et al. (2016a)  | WRF-Chem   | O <sub>3</sub>           | Spring                          | Northwest                     |
| Feng et al. (2016b)  | WRF-Chem   | O <sub>3</sub>           | Summer                          | Northwest                     |
| Feng et al. (2018)   | WRF-Chem   | O <sub>3</sub>           | Winter                          | Northwest                     |
| Feng et al. (2019a)  | CMAQ       | 8-hr max O <sub>3</sub>  | Winter+Spring+Fall              | YRD                           |
| Feng et al. (2019b)  | WRF-Chem   | O <sub>3</sub>           | Fall                            | BTH                           |
| Feng et al. (2020)   | WRF-Chem   | O <sub>3</sub>           | Winter                          | Northwest                     |
| Feng et al. (2021a)  | WRF-Chem   | O <sub>3</sub>           | Fall                            | BTH                           |
| Feng et al. (2021b)  | GEOS-Chem  | O <sub>3</sub>           | Summer                          | Entire China                  |
| Fu et al. (2008)     | CMAQ       | O <sub>3</sub>           | Summer                          | Entire China, PRD + Southeast |
| Fu et al. (2012)     | CMAQ       | O <sub>3</sub>           | summer                          | Southeast                     |
| Fu et al. (2019)     | CMAQ       | 8-hr max O <sub>3</sub>  | Winter                          | PRD                           |
| Gao and Zhang (2012) | CMAQ       | O <sub>3</sub>           | Summer                          | BTH                           |

| Reference            | Model         | O <sub>3</sub> evaluated                          | Seasons            | Regions                                                                          |
|----------------------|---------------|---------------------------------------------------|--------------------|----------------------------------------------------------------------------------|
| Gao et al. (2016)    | WRF-Chem      | O <sub>3</sub>                                    | Spring             | YRD                                                                              |
| Gao et al. (2017)    | WRF-Chem      | O <sub>3</sub>                                    | Summer             | YRD                                                                              |
| Gao et al. (2020a)   | WRF-Chem      | O <sub>3</sub>                                    | fall               | BTH+YRD+PRD+Southeast                                                            |
| Gao et al. (2020b)   | WRF-Chem      | O <sub>3</sub>                                    | Annual             | NCP, YRD, PRD                                                                    |
| Gong and Liao (2019) | GEOS-Chem     | 8-hr max O <sub>3</sub>                           | Summer             | BTH                                                                              |
| Gong et al. (2021)   | GEOS-Chem     | 8-hr max O <sub>3</sub>                           | Spring+Summer+Fall | BTH, YRD                                                                         |
| Guo et al. (2016)    | WRF-Chem      | O <sub>3</sub>                                    | Fall               | BTH                                                                              |
| Guo et al. (2019)    | CMAQ          | O <sub>3</sub>                                    | Summer             | Entire China                                                                     |
| Guo et al. (2020)    | WRF-Chem      | O <sub>3</sub>                                    | Summer, Fall       | BTH, YRD, PRD                                                                    |
| H. et al. (2009)     | CMAQ,WRF-Chem | O <sub>3</sub>                                    | Summer             | BTH                                                                              |
| Han et al. (2013)    | CMAQ          | O <sub>3</sub>                                    | Winter             | BTH                                                                              |
| Han et al. (2014)    | CMAQ          | O <sub>3</sub>                                    | Winter, Summer     | BTH                                                                              |
| Han et al. (2018)    | CMAQ          | O <sub>3</sub>                                    | Summer, Winter     | BTH                                                                              |
| He et al. (2012)     | GEOS-Chem     | O <sub>3</sub>                                    | Summer             | Entire China                                                                     |
| Hong et al. (2017)   | two-way       | O <sub>3</sub>                                    | Spring, Summer     | Entire China                                                                     |
| Hong et al. (2020)   | CMAQ          | O <sub>3</sub>                                    | Annual             | Entire China                                                                     |
| Hu et al. (2016)     | CMAQ          | 1-hr max O <sub>3</sub> , 8-hr max O <sub>3</sub> | Annual             | Entire China, NCP, YRD, PRD, SCB, Northeast, Central China, Northwest, Southwest |

| Reference              | Model     | O <sub>3</sub> evaluated                | Seasons                      | Regions                                                                         |
|------------------------|-----------|-----------------------------------------|------------------------------|---------------------------------------------------------------------------------|
| Hu et al. (2017)       | CMAQ      | O <sub>3</sub> ,1-hr max O <sub>3</sub> | Annual                       | Entire China, Northeast, NCP, Northwest, YRD, Central China, SCB, PRD+Southwest |
| Hu et al. (2018)       | WRF-Chem  | O <sub>3</sub>                          | Summer                       | YRD                                                                             |
| Huang et al. (2016)    | CAMx      | O <sub>3</sub>                          | Spring, Fall                 | PRD                                                                             |
| Huang et al. (2021)    | CMAQ      | O <sub>3</sub>                          | Winter+Spring                | Central china                                                                   |
| Itahashi et al. (2015) | CAMx      | O <sub>3</sub>                          | Spring                       | Entire China                                                                    |
| Jeong and Park (2013)  | GEOS-Chem | O <sub>3</sub>                          | Annual                       | Entire China                                                                    |
| Jiang et al. (2008)    | WRF-Chem  | O <sub>3</sub>                          | Fall                         | PRD                                                                             |
| Jiang et al. (2021)    | GEOS-Chem | 8-hr max O <sub>3</sub>                 | Summer                       | Entire China                                                                    |
| Kwok et al. (2010)     | CMAQ      | O <sub>3</sub>                          | Winter, Spring, Summer, Fall | PRD                                                                             |
| Leung et al. (2020)    | CMAQ      | 1-hr max O <sub>3</sub>                 | Winter, Summer               | BTH+YRD+PRD+Central China+Southeast                                             |
| Li et al. (2007)       | NAQPMS    | O <sub>3</sub>                          | Annual                       | YRD, NCP, Northwest                                                             |
| Li et al. (2008)       | NAQPMS    | O <sub>3</sub>                          | Summer                       | NCP                                                                             |
| Li et al. (2011a)      | NAQPMS    | O <sub>3</sub>                          | Summer                       | NCP                                                                             |
| Li et al. (2011b)      | WRF-Chem  | O <sub>3</sub>                          | Summer                       | BTH                                                                             |
| Li et al. (2012)       | CMAQ      | O <sub>3</sub>                          | Summer                       | YRD                                                                             |
| Li et al. (2013)       | CAMx      | O <sub>3</sub> ,Ox                      | Winter, Spring, Summer, Fall | PRD                                                                             |
| Li et al. (2016a)      | CAMx      | O <sub>3</sub>                          | Summer                       | YRD                                                                             |

| Reference           | Model     | O <sub>3</sub> evaluated                | Seasons              | Regions                                                                          |
|---------------------|-----------|-----------------------------------------|----------------------|----------------------------------------------------------------------------------|
| Li et al. (2016b)   | WRF-Chem  | O <sub>3</sub>                          | Spring               | PRD                                                                              |
| Li et al. (2016c)   | CMAQ      | O <sub>3</sub>                          | Annual               | Southeast                                                                        |
| Li et al. (2016d)   | WRF-Chem  | O <sub>3</sub> ,1-hr max O <sub>3</sub> | Winter               | PRD                                                                              |
| Li et al. (2017a)   | WRF-Chem  | O <sub>3</sub>                          | Spring               | BTH, YRD, PRD, NCP, Northeast, Northwest,<br>Central China, Southeast, Southwest |
| Li et al. (2017b)   | WRF-Chem  | O <sub>3</sub>                          | Spring               | YRD                                                                              |
| Li et al. (2017c)   | two-way   | O <sub>3</sub>                          | Summer+Fall          | YRD                                                                              |
| Li et al. (2018a)   | WRF-Chem  | O <sub>3</sub>                          | Summer               | Northwest                                                                        |
| Li et al. (2018b)   | WRF-Chem  | O <sub>3</sub>                          | Winter               | BTH                                                                              |
| Li et al. (2019)    | CAMx      | 8-hr max O <sub>3</sub>                 | Spring, Summer, Fall | YRD                                                                              |
| Li et al. (2020a)   | WRF-Chem  | O <sub>3</sub>                          | Summer               | Northwest                                                                        |
| Li et al. (2020b)   | CMAQ      | O <sub>3</sub>                          | Annual               | YRD                                                                              |
| Li et al. (2021a)   | CMAQ      | O <sub>3</sub>                          | Spring               | NCP                                                                              |
| Li et al. (2021b)   | GEOS-Chem | 8-hr max O <sub>3</sub>                 | Winter               | BTH                                                                              |
| Li et al. (2021c)   | WRF-Chem  | O <sub>3</sub>                          | Winter               | BTH                                                                              |
| Liao et al. (2014)  | WRF-Chem  | O <sub>3</sub>                          | Winter, Summer       | YRD                                                                              |
| Liao et al. (2015)  | WRF-Chem  | O <sub>3</sub>                          | Winter, Summer       | YRD                                                                              |
| Lin et al. (2009)   | CMAQ      | O <sub>3</sub>                          | spring+Summer        | BTH, YRD, NCP, Northwest                                                         |
| Lin et al. (2016)   | CAMx      | O <sub>3</sub>                          | Summer               | BTH                                                                              |
| Liu and Wang (2020) | CMAQ      | 8-hr max O <sub>3</sub>                 | Annual               | entire china                                                                     |

| Reference          | Model     | O <sub>3</sub> evaluated                          | Seasons                         | Regions                                                         |
|--------------------|-----------|---------------------------------------------------|---------------------------------|-----------------------------------------------------------------|
| Liu et al. (2010)  | CMAQ      | 1-hr max O <sub>3</sub>                           | Spring, Summer, Fall,<br>Winter | BTH+YRD+PRD+Southeast                                           |
| Liu et al. (2018a) | CMAQ      | 1-hr max O <sub>3</sub> , 8-hr max O <sub>3</sub> | Annual                          | Entire China                                                    |
| Liu et al. (2018b) | CMAQ      | O <sub>3</sub>                                    | Summer                          | YRD                                                             |
| Liu et al. (2019a) | CMAQ      | O <sub>3</sub>                                    | Summer                          | BTH                                                             |
| Liu et al. (2019b) | WRF-Chem  | O <sub>3</sub>                                    | Winter                          | BTH                                                             |
| Liu et al. (2019c) | WRF-Chem  | O <sub>3</sub>                                    | Summer                          | BTH                                                             |
| Liu et al. (2020)  | CMAQ      | O <sub>3</sub>                                    | Annual                          | YRD                                                             |
| Liu et al. (2021)  | WRF-Chem  | O <sub>3</sub>                                    | Winter                          | YRD                                                             |
| Long et al. (2016) | WRF-Chem  | O <sub>3</sub>                                    | Fall                            | BTH, NCP                                                        |
| Lou et al. (2014)  | GEOS-Chem | O <sub>3</sub>                                    | Annual                          | BTH+YRD+PRD+SCB                                                 |
| Lou et al. (2015)  | GEOS-Chem | O <sub>3</sub>                                    | Annual                          | PRD, Southwest                                                  |
| Lu et al. (2016)   | CAMx      | O <sub>3</sub>                                    | Winter, Spring, Summer,<br>Fall | PRD                                                             |
| Lu et al. (2019a)  | CAMx      | O <sub>3</sub>                                    | Annual                          | PRD                                                             |
| Lu et al. (2019b)  | GEOS-Chem | 8-hr max O <sub>3</sub>                           | Annual                          | BTH, Central China, NCP, YRD, Northwest,<br>SCB, PRD, Southwest |
| Ma et al. (2018)   | WRF-Chem  | O <sub>3</sub>                                    | Fall                            | BTH                                                             |
| Ma et al. (2021)   | CAMx      | O <sub>3</sub>                                    | Summer                          | NCP                                                             |
| Ni et al. (2018)   | GEOS-Chem | 8-hr max O <sub>3</sub> , O <sub>3</sub>          | Spring                          | BTH, YRD, PRD, NCP, Northeast, Southwest                        |

| Reference           | Model     | O <sub>3</sub> evaluated                          | Seasons                         | Regions      |
|---------------------|-----------|---------------------------------------------------|---------------------------------|--------------|
| Ni et al. (2019)    | WRF-Chem  | 8-hr max O <sub>3</sub>                           | Summer+Fall                     | Entire China |
| Ni et al. (2020)    | WRF-Chem  | 8-hr max O <sub>3</sub> , O <sub>3</sub>          | Summer+Fall                     | YRD          |
| Peng et al. (2011)  | CAMx      | O <sub>3</sub>                                    | Summer, Fall, Winter,<br>Spring | Southeast    |
| Peng et al. (2018)  | WRF-Chem  | O <sub>3</sub>                                    | Fall                            | BTH          |
| Qiao et al. (2019a) | CMAQ      | O <sub>3</sub>                                    | Annual                          | Entire China |
| Qiao et al. (2019b) | CMAQ      | 8-hr max O <sub>3</sub> , 1-hr max O <sub>3</sub> | Winter, Summer                  | SCB          |
| Qiao et al. (2021)  | CMAQ      | 8-hr max O <sub>3</sub>                           | Summer                          | SCB          |
| Qin et al. (2015)   | CMAQ      | 8-hr max O <sub>3</sub>                           | Winter, Spring, Summer,<br>Fall | PRD          |
| Qiu et al. (2017)   | WRF-Chem  | O <sub>3</sub>                                    | Winter                          | BTH+NCP      |
| Qiu et al. (2019a)  | CMAQ      | O <sub>3</sub>                                    | Summer                          | BTH          |
| Qiu et al. (2019b)  | CMAQ      | O <sub>3</sub>                                    | Summer                          | BTH          |
| Qiu et al. (2019c)  | WRF-Chem  | O <sub>3</sub>                                    | Winter                          | BTH          |
| Qiu et al. (2020)   | GEOS-Chem | Ox(1-hr max)                                      | Winter                          | BTH          |
| Qu et al. (2014)    | CAMx      | O <sub>3</sub>                                    | Summer                          | BTH          |
| Qu et al. (2020)    | WRF-Chem  | O <sub>3</sub>                                    | spring                          | YRD          |
| Qu et al. (2021)    | CMAQ      | 8-hr max O <sub>3</sub>                           | Fall, Summer                    | PRD          |
| Sahu et al. (2021)  | CMAQ      | O <sub>3</sub>                                    | Annual                          | Entire China |
| Shen et al. (2021)  | CMAQ      | 8-hr max O <sub>3</sub>                           | Spring+Summer+Fall              | Entire China |



| Reference             | Model     | O <sub>3</sub> evaluated                          | Seasons                         | Regions                                        |
|-----------------------|-----------|---------------------------------------------------|---------------------------------|------------------------------------------------|
| Shi et al. (2021)     | CAMx      | O <sub>3</sub>                                    | Summer, Fall                    | YRD                                            |
| Shu et al. (2016)     | CMAQ      | O <sub>3</sub>                                    | Summer                          | YRD                                            |
| Sicard et al. (2021)  | WRF-Chem  | O <sub>3</sub>                                    | Annual                          | Entire China                                   |
| Su et al. (2017)      | WRF-Chem  | O <sub>3</sub>                                    | Fall                            | BTH                                            |
| Su et al. (2021)      | CMAQ      | 8-hr max O <sub>3</sub>                           | Summer+Fall                     | BTH<br>BTH+YRD+Sichuan                         |
| Sun et al. (2019)     | GEOS-Chem | O <sub>3</sub>                                    | Summer                          | Basin+NCP+Northwest+Southwest+Central<br>China |
| Sun et al. (2021a)    | WRF-Chem  | O <sub>3</sub>                                    | Summer, Summer                  | Central China, NCP                             |
| Sun et al. (2021b)    | GEOS-Chem | O <sub>3</sub>                                    | Annual                          | Entire China                                   |
| Tang et al. (2015)    | WRF-Chem  | O <sub>3</sub>                                    | Summer                          | BTH, PRD                                       |
| Tang et al. (2017a)   | CMAQ      | O <sub>3</sub>                                    | Summer+Fall                     | BTH                                            |
| Tang et al. (2017b)   | CMAQ      | 1-hr max O <sub>3</sub>                           | Summer                          | BTH                                            |
| Tao et al. (2015)     | WRF-Chem  | O <sub>3</sub>                                    | Spring+Summer+Fall              | YRD                                            |
| Tao et al. (2018)     | CMAQ      | O <sub>3</sub>                                    | Summer, Winter                  | BTH                                            |
| Tie et al. (2013)     | WRF-Chem  | O <sub>3</sub>                                    | Fall                            | YRD                                            |
| Wai and Tanner (2014) | CMAQ      | 1-hr max O <sub>3</sub> , 8-hr max O <sub>3</sub> | Spring, Summer, Fall,<br>Winter | Entire China                                   |
| Wang et al. (2006)    | NAQPMS    | O <sub>3</sub>                                    | Spring                          | BTH, PRD, NCP, Central China, Southeast        |
| Wang et al. (2010)    | CMAQ      | O <sub>3</sub>                                    | Fall                            | PRD                                            |

| Reference           | Model     | O <sub>3</sub> evaluated                                           | Seasons              | Regions                                                                    |
|---------------------|-----------|--------------------------------------------------------------------|----------------------|----------------------------------------------------------------------------|
| Wang et al. (2011a) | CMAQ      | O <sub>3</sub>                                                     | Fall                 | PRD                                                                        |
| Wang et al. (2011b) | CMAQ      | O <sub>3</sub>                                                     | Fall                 | PRD                                                                        |
| Wang et al. (2014)  | WRF-Chem  | O <sub>3</sub>                                                     | Summer               | BTH                                                                        |
| Wang et al. (2015)  | CMAQ      | O <sub>3</sub>                                                     | Fall                 | PRD                                                                        |
| Wang et al. (2016a) | WRF-Chem  | O <sub>3</sub>                                                     | Spring               | Entire China                                                               |
| Wang et al. (2016b) | CMAQ      | O <sub>3</sub>                                                     | Annual               | PRD                                                                        |
| Wang et al. (2019a) | NAQPMS    | O <sub>3</sub>                                                     | Summer               | BTH, NCP, Central China                                                    |
| Wang et al. (2019b) | CMAQ      | O <sub>3</sub>                                                     | Summer               | BTH, YRD, PRD, SCB, Southwest,<br>Northwest, Central China, Northeast, NCP |
| Wang et al. (2019c) | CMAQ      | O <sub>3</sub>                                                     | Annual               | BTH, YRD, PRD                                                              |
| Wang et al. (2019d) | CMAQ      | O <sub>3</sub>                                                     | Summer               | BTH, YRD, PRD, SCB                                                         |
| Wang et al. (2019e) | WRF-Chem  | O <sub>3</sub>                                                     | Fall                 | YRD                                                                        |
| Wang et al. (2020)  | WRF-Chem  | 8-hr max O <sub>3</sub>                                            | Winter, Summer       | SCB                                                                        |
| Wang et al. (2021a) | WRF-Chem  | O <sub>3</sub>                                                     | Summer               | PRD                                                                        |
| Wang et al. (2021b) | CMAQ      | O <sub>3</sub>                                                     | Annual               | BTH                                                                        |
| Wang et al. (2021c) | CMAQ      | 8-hr max O <sub>3</sub>                                            | Summer               | Entire China                                                               |
| Wang et al. (2021d) | WRF-Chem  | O <sub>3</sub>                                                     | Winter+Spring+Summer | Central China                                                              |
| Wang et al. (2021e) | CMAQ      | O <sub>3</sub>                                                     | Spring+Summer        | YRD                                                                        |
| Wang et al. (2021f) | GEOS-Chem | 8-hr max O <sub>3</sub>                                            | Summer               | BTH                                                                        |
| Wang et al. (2021g) | CMAQ      | 1-hr max O <sub>3</sub> , 8-hr max O <sub>3</sub> , O <sub>3</sub> | Winter               | YRD                                                                        |

| Reference            | Model    | O <sub>3</sub> evaluated | Seasons        | Regions                                                               |
|----------------------|----------|--------------------------|----------------|-----------------------------------------------------------------------|
| Wei et al. (2018)    | WRF-Chem | 8-hr max O <sub>3</sub>  | Summer         | BTH                                                                   |
| Wei et al. (2019)    | WRF-Chem | O <sub>3</sub>           | Summer         | BTH                                                                   |
| Wen et al. (2020)    | WRF-Chem | O <sub>3</sub>           | Winter         | BTH                                                                   |
| Wu et al. (2011)     | NAQPMS   | O <sub>3</sub>           | Summer         | BTH                                                                   |
| Wu et al. (2017)     | WRF-Chem | O <sub>3</sub>           | Summer         | BTH                                                                   |
| Wu et al. (2018)     | WRF-Chem | O <sub>3</sub>           | Spring         | NCP                                                                   |
| Wu et al. (2020)     | CMAQ     | 1-hr max O <sub>3</sub>  | Summer         | Entire China, BTH, YRD, PRD, SCB, Entire China except BTH+YRD+PRD+SCB |
| Wu et al. (2021)     | WRF-Chem | O <sub>3</sub>           | Winter         | Northwest                                                             |
| Xie et al. (2016a)   | WRF-Chem | O <sub>3</sub>           | Winter, Summer | YRD                                                                   |
| Xie et al. (2016b)   | WRF-Chem | O <sub>3</sub>           | Winter, Summer | PRD, Southwest                                                        |
| Xing et al. (2011a)  | CMAQ     | 1-hr max O <sub>3</sub>  | Summer         | BTH, YRD, PRD, BTH+YRD+PRD+Southeast                                  |
| Xing et al. (2011b)  | CMAQ     | O <sub>3</sub>           | Summer         | BTH                                                                   |
| Xing et al. (2017)   | CMAQ     | 1-hr max O <sub>3</sub>  | Winter, Summer | Entire China, BTH, YRD, PRD, Central China, SCB                       |
| Xing et al. (2018)   | CMAQ     | O <sub>3</sub>           | Winter, Summer | BTH                                                                   |
| Xu et al. (2019)     | WRF-Chem | O <sub>3</sub>           | Fall           | YRD                                                                   |
| Xu et al. (2020)     | WRF-Chem | O <sub>3</sub>           | Summer         | BTH                                                                   |
| Yamaji et al. (2010) | CMAQ     | O <sub>3</sub>           | Summer         | NCP                                                                   |

| Reference           | Model     | O <sub>3</sub> evaluated                | Seasons                         | Regions                        |
|---------------------|-----------|-----------------------------------------|---------------------------------|--------------------------------|
| Yan et al. (2021)   | GEOS-Chem | 8-hr max O <sub>3</sub>                 | Spring+Summer                   | Central China                  |
| Yang et al. (2014)  | GEOS-Chem | O <sub>3</sub>                          | Summer                          | PRD                            |
| Yang et al. (2018)  | CMAQ      | O <sub>3</sub>                          | Summer                          | BTH                            |
| Yang et al. (2019a) | WRF-Chem  | 8-hr max O <sub>3</sub>                 | Annual                          | Northwest, SCB, NCP, Southwest |
| Yang et al. (2019b) | NAQPMS    | O <sub>3</sub>                          | Winter, Spring, Summer,<br>Fall | PRD                            |
| Yang et al. (2020a) | WRF-Chem  | O <sub>3</sub>                          | Annual                          | Northwest+Southwest            |
| Yang et al. (2020b) | CMAQ      | O <sub>3</sub>                          | Summer                          | scb                            |
| Yang et al. (2021a) | CMAQ      | O <sub>3</sub>                          | Spring                          | SCB                            |
| Yang et al. (2021b) | CMAQ      | O <sub>3</sub> ,8-hr max O <sub>3</sub> | Winter, Spring, Summer,<br>Fall | YRD                            |
| Yao et al. (2021)   | CMAQ      | 8-hr max O <sub>3</sub>                 | Summer                          | BTH                            |
| Ye et al. (2016)    | WRF-Chem  | O <sub>3</sub>                          | Fall                            | PRD                            |
| Yin et al. (2018)   | CAMx      | O <sub>3</sub>                          | Spring, Fall                    | PRD                            |
| Yin et al. (2021)   | GEOS-Chem | O <sub>3</sub>                          | Spring+Summer                   | Entire China                   |
| You et al. (2017)   | CMAQ      | O <sub>3</sub>                          | Summer                          | PRD                            |
| Yu et al. (2012)    | WRF-Chem  | O <sub>3</sub>                          | Spring                          | BTH, YRD                       |
| Yu et al. (2014a)   | WRF-Chem  | O <sub>3</sub>                          | Summer                          | BTH                            |
| Yu et al. (2014b)   | CMAQ      | O <sub>3</sub>                          | Summer                          | PRD                            |
| Yu et al. (2019)    | CMAQ      | O <sub>3</sub>                          | Winter, Spring, Summer,         | PRD                            |

| Reference            | Model         | O <sub>3</sub> evaluated                                          | Seasons                      | Regions                         |
|----------------------|---------------|-------------------------------------------------------------------|------------------------------|---------------------------------|
|                      |               |                                                                   | Fall                         |                                 |
| Zeren et al. (2019)  | WRF-Chem      | O <sub>3</sub>                                                    | Fall                         | PRD                             |
| Zhang et al. (2013)  | CMAQ          | O <sub>3</sub>                                                    | Fall                         | PRD                             |
| Zhang et al. (2015)  | WRF-Chem      | O <sub>3</sub>                                                    | Summer                       | YRD                             |
| Zhang et al. (2016)  | CMAQ,WRF-Chem | O <sub>3</sub>                                                    | Winter, Spring, Summer, Fall | PRD, Southeast, Southeast       |
| Zhang et al. (2017a) | WRF-Chem      | O <sub>3</sub>                                                    | Spring                       | YRD                             |
| Zhang et al. (2017b) | WRF-Chem      | O <sub>3</sub>                                                    | Summer                       | Entire China, YRD, PRD, BTH+NCP |
| Zhang et al. (2018)  | WRF-Chem      | O <sub>3</sub>                                                    | Winter                       | YRD                             |
| Zhang et al. (2020)  | NAQPMS        | O <sub>3</sub> ,Ox                                                | Summer                       | BTH                             |
| Zhang et al. (2021a) | WRF-Chem      | O <sub>3</sub>                                                    | Winter, Spring, Summer, Fall | Entire China                    |
| Zhang et al. (2021b) | CMAQ          | O <sub>3</sub>                                                    | Fall, Summer, Winter         | BTH+YRD+PRD+SCB                 |
| Zhang et al. (2021c) | WRF-Chem      | O <sub>3</sub>                                                    | Fall                         | YRD                             |
| Zhang et al. (2021d) | CMAQ          | O <sub>3</sub> ,1-hr max O <sub>3</sub>                           | Spring+Summer                | YRD                             |
| Zhao et al. (2017)   | CMAQ          | 1-hr max O <sub>3</sub>                                           | Winter, Spring, Summer, Fall | YRD                             |
| Zhao et al. (2021a)  | CMAQ          | O <sub>3</sub>                                                    | Fall                         | PRD                             |
| Zhao et al. (2021b)  | WRF-Chem      | O <sub>3</sub>                                                    | Annual                       | NCP                             |
| Zheng et al. (2019)  | CMAQ          | O <sub>3</sub> ,1-hr max O <sub>3</sub> , 8-hr max O <sub>3</sub> | Summer, Winter               | BTH                             |

| Reference           | Model     | O <sub>3</sub> evaluated                 | Seasons     | Regions                                                |
|---------------------|-----------|------------------------------------------|-------------|--------------------------------------------------------|
| Zheng et al. (2021) | CMAQ      | O <sub>3</sub>                           | Summer+Fall | PRD, Southeast                                         |
| Zhou et al. (2010)  | CMAQ      | 8-hr max O <sub>3</sub> , O <sub>3</sub> | Summer      | YRD                                                    |
| Zhou et al. (2017a) | WRF-Chem  | 8-hr max O <sub>3</sub>                  | Annual      | BTH+YRD+NCP+Central China+Southeast                    |
| Zhou et al. (2017b) | CMAQ      | O <sub>3</sub>                           | Fall        | YRD                                                    |
| Zhu and Liao (2016) | GEOS-Chem | O <sub>3</sub>                           | Annual      | BTH, Northwest, YRD, PRD, SCB,<br>Southwest, Northeast |

**Table S2** List of statistical metrics used in studies complied in this study

| No. | Abbreviation | Metric                                                             | No. of studies used |
|-----|--------------|--------------------------------------------------------------------|---------------------|
| 1   | R(R2)        | Correlation coefficient                                            | 135                 |
| 2   | MB           | Mean bias                                                          | 112                 |
| 3   | NMB          | Normalized mean bias                                               | 123                 |
| 4   | RMSE         | Root mean square error                                             | 89                  |
| 5   | NME          | Normalized mean error                                              | 78                  |
| 6   | IOA          | Index of agreement                                                 | 53                  |
| 7   | FB           | Fractional bias                                                    | 33                  |
| 8   | FE           | Fractional error                                                   | 30                  |
| 9   | ME           | Mean error                                                         | 14                  |
| 10  | MNB          | Mean normalized bias                                               | 9                   |
| 11  | MNE          | Mean normalized error                                              | 7                   |
| 12  | FAC2         | Fraction of prediction within a factor of two of the observations  | 5                   |
| 13  | MAGE         | Mean absolute gross error                                          | 2                   |
| 14  | NB           | Normalized bias                                                    | 2                   |
| 15  | UPPA         | Unpaired peak prediction accuracy                                  | 1                   |
| 16  | AUP          | Accuracy of Unpaired Peak                                          | 1                   |
| 17  | Bias Factor  | No definition given                                                | 1                   |
| 18  | FAC5         | Fraction of prediction within a factor of five of the observations | 1                   |
| 19  | FRA          | Fraction                                                           | 1                   |
| 20  | MAD          | Mean absolute deviation                                            | 1                   |
| 21  | NMAD         | Normalized mean absolute difference                                | 1                   |
| 22  | NMGE         | Normalized mean gross error                                        | 1                   |
| 23  | RB           | Relative bias                                                      | 1                   |

**Table S3** Definition of regions

| No. | Region                     | Provinces included                        |
|-----|----------------------------|-------------------------------------------|
| 1   | BTH(Beijing-Tianjin-Hebei) | Beijing, Tianjin, Hebei                   |
| 2   | Central China              | Shanxi, Henan, Hubei, Hunan, Jiangxi      |
| 3   | NCP(North China Plain)     | Inner Mongolia, Shandong                  |
| 4   | Northeast                  | Liaoning, Heilongjiang, Jilin             |
| 5   | Northwest                  | Xinjiang, Qinghai, Gansu, Ningxia, Shanxi |
| 6   | PRD(Pearl River Delta)     | Guangdong, Hong Kong, Macau               |
| 7   | SCB(Sichuan Basin)         | Sichuan, Chongqing                        |
| 8   | Southeast                  | Fujian, Taiwan                            |
| 9   | Southwest                  | Tibet, Yunnan, Guizhou, Hainan, Guangxi   |
| 10  | YRD(Yangtze River Delta)   | Jiangsu, Zhejiang, Shanghai, Anhui        |

**Table S4** Definition of statistical metrics used in more than ten studies complied in this work

| No. | Statistics (abbreviation)     | Definition                                                                                                       | Note                             |
|-----|-------------------------------|------------------------------------------------------------------------------------------------------------------|----------------------------------|
| 1   | Correlation coefficient (R)   | $\frac{\sum[(P_j - \bar{P}) \times (O_j - \bar{O})]}{\sqrt{\sum(P_j - \bar{P})^2 \times \sum(O_j - \bar{O})^2}}$ | Unitless, $-1 \leq R \leq 1$     |
| 2   | Index of agreement (IOA/d)    | $1 - \frac{\sum(P_j - O_j)^2}{\sum( P_j - \bar{O}  +  O_j - \bar{O} )^2}$                                        | Unitless, $0 \leq d \leq 1$      |
| 3   | Normalize mean bias (NMB)     | $\frac{\sum(P_j - O_j)}{\sum O_j} \times 100$                                                                    | $-100\% \leq NMB \leq +\infty$   |
| 4   | Normalize mean error (NME)    | $\frac{\sum  P_j - O_j }{\sum O_j} \times 100$                                                                   | $0\% \leq NME \leq +\infty$      |
| 5   | Fractional bias (FB)          | $\frac{2 \sum(P_j - O_j)}{N (P_j + O_j)} \times 100$                                                             | -<br>$200\% \leq FB \leq +200\%$ |
| 6   | Fractional error (FE)         | $\frac{2 \sum  P_j - O_j }{N (P_j + O_j)} \times 100$                                                            | $0\% \leq FE \leq +200\%$        |
| 7   | Root mean square error (RMSE) | $\sqrt{\frac{\sum(P_j - O_j)^2}{N}}$                                                                             | concentration unit               |
| 8   | Mean bias (MB)                | $\frac{\sum(P_j - O_j)}{N}$                                                                                      | concentration unit               |
| 9   | Mean error (ME)               | $\frac{\sum  P_j - O_j }{N}$                                                                                     | concentration unit               |



**Table S5** Estimated uncertainties in emissions, dry deposition velocities and boundary concentrations

| Model input                               | Uncertainty factor | Reference                                                   |
|-------------------------------------------|--------------------|-------------------------------------------------------------|
| Anthropogenic NO <sub>x</sub> emissions   | 1.36               | (Cheng et al., 2019; Zheng et al., 2021; Zhao et al., 2011) |
| Anthropogenic VOCs emissions              | 1.97               | (Cheng et al., 2019; Zhao et al., 2013)                     |
| Soil NO <sub>x</sub> emissions            | 2                  | (Dunker et al., 2020; Liu et al., 2017)                     |
| Biogenic VOCs emissions                   | 1.71               | (Wang et al., 2021; Wang et al., 2023)                      |
| Dry deposition velocity of O <sub>3</sub> | 2                  | (Dunker et al., 2020; Derwent et al., 2018)                 |
| Boundary concentrations of O <sub>3</sub> | 1.25               | (Dunker et al., 2020; Beddows et al., 2017)                 |

\*The multiplicative factor represents  $2\sigma$  of the lognormal uncertainty distribution. Estimates are subjective but based on a review of recent work

**Table S6** Quantile values of selected statistical metrics for O<sub>3</sub>, 1-hr max O<sub>3</sub> and 8-hr max O<sub>3</sub>

| Pollutant               | Metric | Unit              | n   | 10%  | 25%  | 33%  | 50%  | 67%   | 75%   | 90%   |
|-------------------------|--------|-------------------|-----|------|------|------|------|-------|-------|-------|
| O <sub>3</sub>          | R      | -                 | 891 | 0.87 | 0.78 | 0.74 | 0.69 | 0.63  | 0.6   | 0.51  |
| O <sub>3</sub>          | IOA    | -                 | 251 | 0.91 | 0.88 | 0.85 | 0.8  | 0.73  | 0.68  | 0.57  |
| O <sub>3</sub>          | MB     | µg/m <sup>3</sup> | 476 | 32.9 | 15.4 | 9.3  | 1.2  | -4.8  | -9.5  | -22.6 |
| O <sub>3</sub>          | ME     | µg/m <sup>3</sup> | 41  | 49.2 | 44.0 | 41.5 | 35.5 | 30.9  | 26.1  | 17.9  |
| O <sub>3</sub>          | NMB    | %                 | 593 | 40.8 | 18.2 | 10.2 | -1.0 | -12.7 | -18.5 | -33.0 |
| O <sub>3</sub>          | NME    | %                 | 341 | 60.7 | 49.2 | 43.5 | 34.1 | 26.1  | 22.6  | 1.0   |
| O <sub>3</sub>          | FB     | %                 | 439 | 31.2 | 8    | -1   | -15  | -25   | -31   | -56   |
| O <sub>3</sub>          | FE     | %                 | 440 | 90.1 | 73   | 65   | 56   | 47    | 44    | 1.375 |
| O <sub>3</sub>          | RMSE   | µg/m <sup>3</sup> | 331 | 69.5 | 56.3 | 49.4 | 37.5 | 27.8  | 23.4  | 16.1  |
| 1-hr max O <sub>3</sub> | R      | -                 | 19  | 0.88 | 0.84 | 0.80 | 0.66 | 0.60  | 0.51  | 0.16  |
| 1-hr max O <sub>3</sub> | IOA    | -                 | 0   | —    | —    | —    | —    | —     | —     | —     |
| 1-hr max O <sub>3</sub> | MB     | µg/m <sup>3</sup> | 12  | 8.1  | 5.4  | 3.5  | -4.4 | -12.5 | -13.3 | -14.6 |
| 1-hr max O <sub>3</sub> | ME     | µg/m <sup>3</sup> | 6   | 22.7 | 17.8 | 17.2 | 16.5 | 15.6  | 14.9  | 12.3  |
| 1-hr max O <sub>3</sub> | NMB    | %                 | 150 | 53.1 | 29.9 | 18.9 | 3.1  | -20.8 | -25.0 | -32.1 |
| 1-hr max O <sub>3</sub> | NME    | %                 | 71  | 55.0 | 36.5 | 32.9 | 29.0 | 21.9  | 17.8  | 14.0  |
| 1-hr max O <sub>3</sub> | FB     | %                 | 35  | 12.0 | 8.0  | 5.8  | 1.0  | -1.0  | -3.0  | -9.0  |
| 1-hr max O <sub>3</sub> | FE     | %                 | 35  | 31.6 | 30.0 | 29.0 | 28.0 | 27.0  | 27.0  | 24.9  |
| 1-hr max O <sub>3</sub> | RMSE   | µg/m <sup>3</sup> | 9   | 55.5 | 49.0 | 42.7 | 37.0 | 31.3  | 28.2  | 23.8  |
| 8-hr max O <sub>3</sub> | R      | -                 | 119 | 0.81 | 0.75 | 0.72 | 0.63 | 0.57  | 0.47  | -0.40 |
| 8-hr max O <sub>3</sub> | IOA    | -                 | 36  | 0.95 | 0.88 | 0.82 | 0.80 | 0.73  | 0.67  | 0.55  |
| 8-hr max O <sub>3</sub> | MB     | µg/m <sup>3</sup> | 36  | 25.9 | 10.1 | 8.4  | 4.5  | -0.2  | -0.3  | -7.2  |
| 8-hr max O <sub>3</sub> | ME     | µg/m <sup>3</sup> | 12  | 44.6 | 27.8 | 16.1 | 0.4  | 0.3   | 0.3   | 0.3   |
| 8-hr max O <sub>3</sub> | NMB    | %                 | 170 | 33.6 | 17.9 | 13.0 | 5.4  | -2.0  | -5.0  | -14.0 |
| 8-hr max O <sub>3</sub> | NME    | %                 | 140 | 47.2 | 37.3 | 31.0 | 26.6 | 20.0  | 17.0  | 11.9  |
| 8-hr max O <sub>3</sub> | FB     | %                 | 180 | 73.3 | 24.3 | 10.0 | 4.0  | -2.0  | -6.0  | -21.2 |
| 8-hr max O <sub>3</sub> | FE     | %                 | 180 | 76.2 | 43.0 | 38.0 | 28.0 | 25.0  | 23.0  | 14.0  |
| 8-hr max O <sub>3</sub> | RMSE   | µg/m <sup>3</sup> | 11  | 57.4 | 49.5 | 39.5 | 21.3 | 19.1  | 17.3  | 16.2  |

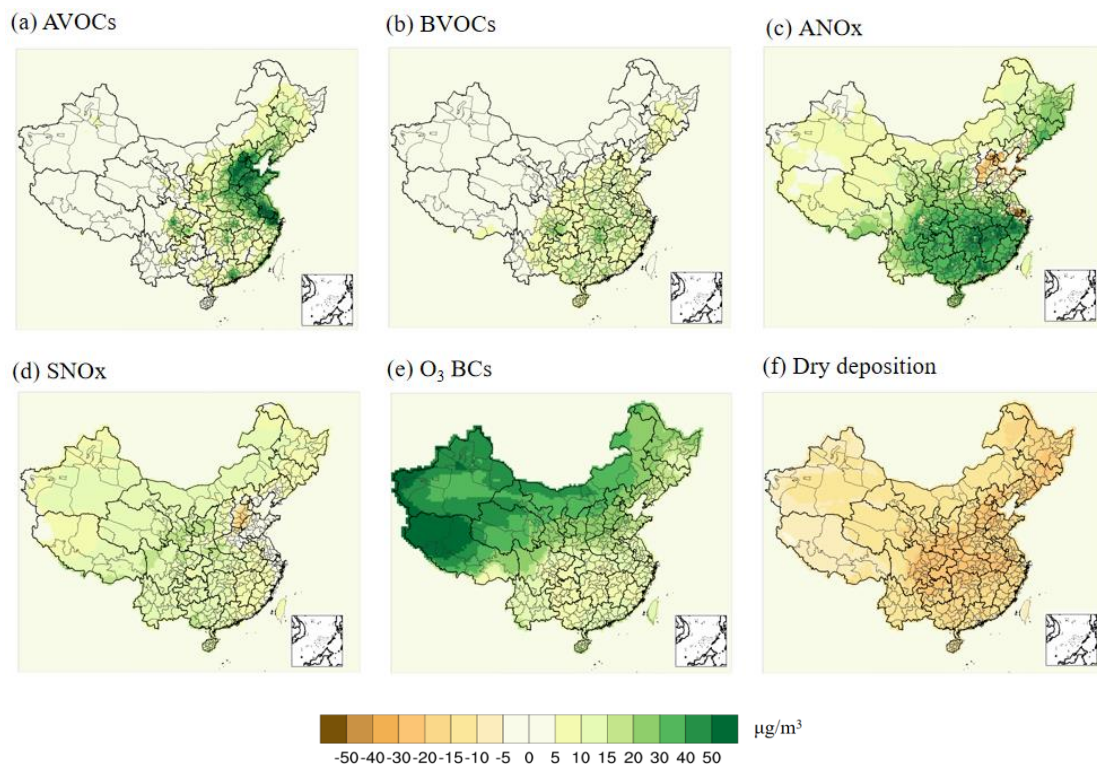

**Figure S1** First-order sensitivities of MDA8 O<sub>3</sub> to (a) AVOCs, (b) BVOCs, (c) ANO<sub>x</sub>, (d) SNO<sub>x</sub>, (e) O<sub>3</sub> BCs and (f) Dry Deposition in µg/m<sup>3</sup>. Results are averages over all days in June 2021.

## References

- An, X., Sun, Z., Lin, W., Jin, M., and Li, N.: Emission inventory evaluation using observations of regional atmospheric background stations of China, *Journal of Environmental Sciences*, 25, 537-546, [https://doi.org/10.1016/S1001-0742\(12\)60082-5](https://doi.org/10.1016/S1001-0742(12)60082-5), 2013.
- Ansari, T. U., Wild, O., Li, J., Yang, T., Xu, W., Sun, Y., and Wang, Z.: Effectiveness of short-term air quality emission controls: a high-resolution model study of Beijing during the Asia-Pacific Economic Cooperation (APEC) summit period, *Atmos. Chem. Phys.*, 19, 8651-8668, <https://doi.org/10.5194/acp-19-8651-2019>, 2019.
- Beddows, A. V., Kitwiroon, N., Williams, M. L., and Beevers, S. D.: Emulation and Sensitivity Analysis of the Community Multiscale Air Quality Model for a UK Ozone Pollution Episode, *Environmental Science & Technology*, 51, 6229-6236, <https://doi.org/10.1021/acs.est.6b05873>, 2017.
- Bei, N., Xiao, B., Meng, N., and Feng, T.: Critical role of meteorological conditions in a persistent haze episode in the Guanzhong basin, China, *Sci. Total Environ.*, 550, 273-284, <https://doi.org/10.1016/j.scitotenv.2015.12.159>, 2016.
- Bei, N., Zhao, L., Wu, J., Li, X., Feng, T., and Li, G.: Impacts of sea-land and mountain-valley circulations on the air pollution in Beijing-Tianjin-Hebei (BTH): A case study, *Environmental Pollution*, 234, 429-438, <https://doi.org/10.1016/j.envpol.2017.11.066>, 2018.
- Bouarar, I., Brasseur, G., Petersen, K., Granier, C., Fan, Q., Wang, X., Wang, L., Ji, D., Liu, Z., Xie, Y., Gao, W., and Elguindi, N.: Influence of anthropogenic emission inventories on simulations of air quality in China during winter and summer 2010, *Atmospheric Environment*, 198, 236-256, <https://doi.org/10.1016/j.atmosenv.2018.10.043>, 2019.
- Campbell, P., Zhang, Y., Wang, K., Leung, R., Fan, J., Zheng, B., Zhang, Q., and He, K.: Evaluation of a multi-scale WRF-CAM5 simulation during the 2010 East Asian Summer Monsoon, *Atmospheric Environment*, 169, 204-217, <https://doi.org/10.1016/j.atmosenv.2017.09.008>, 2017.
- Chang, L., He, F., Tie, X., Xu, J., and Gao, W.: Meteorology driving the highest ozone level occurred during mid-spring to early summer in Shanghai, China, *Sci. Total Environ.*, 785, 147253, <https://doi.org/10.1016/j.scitotenv.2021.147253>, 2021.
- Che, W., Zheng, J., Wang, S., Zhong, L., and Lau, A.: Assessment of motor vehicle emission control policies using Model-3/CMAQ model for the Pearl River Delta region, China, *Atmospheric Environment*, 45, 1740-1751, <https://doi.org/10.1016/j.atmosenv.2010.12.050>, 2011.

- Chen, D., Liu, Z., Fast, J., and Ban, J.: Simulations of sulfate–nitrate–ammonium (SNA) aerosols during the extreme haze events over northern China in October 2014, *Atmos. Chem. Phys.*, 16, 10707-10724, <https://doi.org/10.5194/acp-16-10707-2016>, 2016.
- Chen, D., Liao, H., Yang, Y., Chen, L., and Wang, H.: Simulated aging processes of black carbon and its impact during a severe winter haze event in the Beijing-Tianjin-Hebei region, *Sci. Total Environ.*, 755, 142712, <https://doi.org/10.1016/j.scitotenv.2020.142712>, 2021a.
- Chen, K., Wang, P., Zhao, H., Wang, P., Gao, A., Myllyvirta, L., and Zhang, H.: Summertime O<sub>3</sub> and related health risks in the north China plain: A modeling study using two anthropogenic emission inventories, *Atmospheric Environment*, 246, 118087, <https://doi.org/10.1016/j.atmosenv.2020.118087>, 2021b.
- Chen, L., Xing, J., Mathur, R., Liu, S., Wang, S., and Hao, J.: Quantification of the enhancement of PM(2.5) concentration by the downward transport of ozone from the stratosphere, *Chemosphere*, 255, 126907, <https://doi.org/10.1016/j.chemosphere.2020.126907>, 2020.
- Chen, X., Situ, S., Zhang, Q., Wang, X., Sha, C., Zhou, L., Wu, L., Wu, L., Ye, L., and Li, C.: The synergetic control of NO<sub>2</sub> and O<sub>3</sub> concentrations in a manufacturing city of southern China, *Atmospheric Environment*, 201, 402-416, <https://doi.org/10.1016/j.atmosenv.2018.12.021>, 2019.
- Chen, X., Zhang, Y., Zhao, J., Liu, Y., Shen, C., Wu, L., Wang, X., Fan, Q., Zhou, S., and Hang, J.: Regional modeling of secondary organic aerosol formation over eastern China: The impact of uptake coefficients of dicarbonyls and semivolatile process of primary organic aerosol, *Sci. Total Environ.*, 793, 148176, <https://doi.org/10.1016/j.scitotenv.2021.148176>, 2021c.
- Cheng, J., Su, J., Cui, T., Li, X., Dong, X., Sun, F., Yang, Y., Tong, D., Zheng, Y., Li, Y., Li, J., Zhang, Q., and He, K.: Dominant role of emission reduction in PM<sub>2.5</sub> air quality improvement in Beijing during 2013–2017: a model-based decomposition analysis, *Atmos. Chem. Phys.*, 19, 6125-6146, <https://doi.org/10.5194/acp-19-6125-2019>, 2019.
- Cui, H., Chen, W., Dai, W., Liu, H., Wang, X., and He, K.: Source apportionment of PM<sub>2.5</sub> in Guangzhou combining observation data analysis and chemical transport model simulation, *Atmospheric Environment*, 116, 262-271, <https://doi.org/10.1016/j.atmosenv.2015.06.054>, 2015.
- Dang, R. and Liao, H.: Radiative Forcing and Health Impact of Aerosols and Ozone in China as the Consequence of Clean Air Actions over 2012–2017, *Geophysical Research Letters*, 46, 12511-12519, <https://doi.org/10.1029/2019GL084605>, 2019.

Dang, R., Liao, H., and Fu, Y.: Quantifying the anthropogenic and meteorological influences on summertime surface ozone in China over 2012–2017, *Sci. Total Environ.*, 754, 142394, <https://doi.org/10.1016/j.scitotenv.2020.142394>, 2021.

Derwent, R. G., Parrish, D. D., Galbally, I. E., Stevenson, D. S., Doherty, R. M., Naik, V., and Young, P. J.: Uncertainties in models of tropospheric ozone based on Monte Carlo analysis: Tropospheric ozone burdens, atmospheric lifetimes and surface distributions, *Atmospheric Environment*, 180, 93-102, <https://doi.org/10.1016/j.atmosenv.2018.02.047>, 2018.

Ding, D., Xing, J., Wang, S., Dong, Z., Zhang, F., Liu, S., and Hao, J.: Optimization of a NO<sub>x</sub> and VOC Cooperative Control Strategy Based on Clean Air Benefits, *Environmental Science & Technology*, 56, 739-749, <https://doi.org/10.1021/acs.est.1c04201>, 2022.

Dong, X., Gao, Y., Fu, J. S., Li, J., Huang, K., Zhuang, G., and Zhou, Y.: Probe into gaseous pollution and assessment of air quality benefit under sector dependent emission control strategies over megacities in Yangtze River Delta, China, *Atmospheric Environment*, 79, 841-852, <https://doi.org/10.1016/j.atmosenv.2013.07.041>, 2013.

Duan, W., Wang, X., Cheng, S., Wang, R., and Zhu, J.: Influencing factors of PM<sub>2.5</sub> and O<sub>3</sub> from 2016 to 2020 based on DLNM and WRF-CMAQ, *Environmental Pollution*, 285, 117512, <https://doi.org/10.1016/j.envpol.2021.117512>, 2021.

Dunker, A. M., Wilson, G., Bates, J. T., and Yarwood, G.: Chemical Sensitivity Analysis and Uncertainty Analysis of Ozone Production in the Comprehensive Air Quality Model with Extensions Applied to Eastern Texas, *Environmental Science & Technology*, 54, 5391-5399, <https://doi.org/10.1021/acs.est.9b07543>, 2020.

Fan, Q., Yu, W., Fan, S., Wang, X., Lan, J., Zou, D., Feng, Y., and Chan, P.-w.: Process analysis of a regional air pollution episode over Pearl River Delta Region, China, using the MM5-CMAQ model, *Journal of the Air & Waste Management Association*, 64, 406-418, <https://doi.org/10.1080/10962247.2013.816387>, 2014.

Fan, Q., Lan, J., Liu, Y., Wang, X., Chan, P., Hong, Y., Feng, Y., Liu, Y., Zeng, Y., and Liang, G.: Process analysis of regional aerosol pollution during spring in the Pearl River Delta region, China, *Atmospheric Environment*, 122, 829-838, <https://doi.org/10.1016/j.atmosenv.2015.09.013>, 2015.

Fang, T., Zhu, Y., Wang, S., Xing, J., Zhao, B., Fan, S., Li, M., Yang, W., Chen, Y., and Huang, R.: Source impact and contribution analysis of ambient ozone using multi-modeling approaches over the Pearl River Delta region, China, *Environmental Pollution*, 289, 117860, <https://doi.org/10.1016/j.envpol.2021.117860>, 2021.

Feng, R., Zheng, H.-j., Zhang, A.-r., Huang, C., Gao, H., and Ma, Y.-c.: Unveiling tropospheric ozone by the traditional atmospheric model and machine learning, and their comparison: A case study in Hangzhou, China, *Environmental Pollution*, 252, 366-378, <https://doi.org/10.1016/j.envpol.2019.05.101>, 2019a.

Feng, T., Zhao, S., Bei, N., Liu, S., and Li, G.: Increasing atmospheric oxidizing capacity weakens emission mitigation effort in Beijing during autumn haze events, *Chemosphere*, 281, 130855, <https://doi.org/10.1016/j.chemosphere.2021.130855>, 2021a.

Feng, T., Zhao, S., Zhang, X., Wang, Q., Liu, L., Li, G., and Tie, X.: Increasing wintertime ozone levels and secondary aerosol formation in the Guanzhong basin, central China, *Sci. Total Environ.*, 745, 140961, <https://doi.org/10.1016/j.scitotenv.2020.140961>, 2020.

Feng, T., Bei, N., Zhao, S., Wu, J., Li, X., Zhang, T., Cao, J., Zhou, W., and Li, G.: Wintertime nitrate formation during haze days in the Guanzhong basin, China: A case study, *Environmental Pollution*, 243, 1057-1067, <https://doi.org/10.1016/j.envpol.2018.09.069>, 2018.

Feng, T., Li, G., Cao, J., Bei, N., Shen, Z., Zhou, W., Liu, S., Zhang, T., Wang, Y., Huang, R. J., Tie, X., and Molina, L. T.: Simulations of organic aerosol concentrations during springtime in the Guanzhong Basin, China, *Atmos. Chem. Phys.*, 16, 10045-10061, <https://doi.org/10.5194/acp-16-10045-2016>, 2016a.

Feng, T., Bei, N., Huang, R. J., Cao, J., Zhang, Q., Zhou, W., Tie, X., Liu, S., Zhang, T., Su, X., Lei, W., Molina, L. T., and Li, G.: Summertime ozone formation in Xi'an and surrounding areas, China, *Atmos. Chem. Phys.*, 16, 4323-4342, <https://doi.org/10.5194/acp-16-4323-2016>, 2016b.

Feng, T., Zhao, S., Bei, N., Wu, J., Liu, S., Li, X., Liu, L., Qian, Y., Yang, Q., Wang, Y., Zhou, W., Cao, J., and Li, G.: Secondary organic aerosol enhanced by increasing atmospheric oxidizing capacity in Beijing–Tianjin–Hebei (BTH), China, *Atmos. Chem. Phys.*, 19, 7429-7443, <https://doi.org/10.5194/acp-19-7429-2019>, 2019b.

Feng, X., Lin, H., Fu, T. M., Sulprizio, M. P., Zhuang, J., Jacob, D. J., Tian, H., Ma, Y., Zhang, L., Wang, X., Chen, Q., and Han, Z.: WRF-GC (v2.0): online two-way coupling of WRF (v3.9.1.1) and GEOS-Chem (v12.7.2) for modeling regional atmospheric chemistry–meteorology interactions, *Geosci. Model Dev.*, 14, 3741-3768, <https://doi.org/10.5194/gmd-14-3741-2021>, 2021b.

Fu, J. S., Dong, X., Gao, Y., Wong, D. C., and Lam, Y. F.: Sensitivity and linearity analysis of ozone in East Asia: the effects of domestic emission and intercontinental transport, *Journal of the Air & Waste Management Association* (1995), 62, 1102-1114, <https://doi.org/10.1080/10962247.2012.699014>, 2012.

Fu, J. S., Jang, C. J., Streets, D. G., Li, Z., Kwok, R., Park, R., and Han, Z.: MICS-Asia II: Modeling gaseous pollutants and evaluating an advanced modeling system over East Asia, *Atmospheric Environment*, 42, 3571-3583, <https://doi.org/10.1016/j.atmosenv.2007.07.058>, 2008.

Fu, X., Wang, T., Zhang, L., Li, Q., Wang, Z., Xia, M., Yun, H., Wang, W., Yu, C., Yue, D., Zhou, Y., Zheng, J., and Han, R.: The significant contribution of HONO to secondary pollutants during a severe winter pollution event in southern China, *Atmos. Chem. Phys.*, 19, 1-14, <https://doi.org/10.5194/acp-19-1-2019>, 2019.

Gao, J., Li, Y., Zhu, B., Hu, B., Wang, L., and Bao, F.: What have we missed when studying the impact of aerosols on surface ozone via changing photolysis rates?, *Atmos. Chem. Phys.*, 20, 10831-10844, <https://doi.org/10.5194/acp-20-10831-2020>, 2020a.

Gao, J., Zhu, B., Xiao, H., Kang, H., Hou, X., and Shao, P.: A case study of surface ozone source apportionment during a high concentration episode, under frequent shifting wind conditions over the Yangtze River Delta, China, *Sci. Total Environ.*, 544, 853-863, <https://doi.org/10.1016/j.scitotenv.2015.12.039>, 2016.

Gao, J., Zhu, B., Xiao, H., Kang, H., Hou, X., Yin, Y., Zhang, L., and Miao, Q.: Diurnal variations and source apportionment of ozone at the summit of Mount Huang, a rural site in Eastern China, *Environmental Pollution*, 222, 513-522, <https://doi.org/10.1016/j.envpol.2016.11.031>, 2017.

Gao, M., Gao, J., Zhu, B., Kumar, R., Lu, X., Song, S., Zhang, Y., Jia, B., Wang, P., Beig, G., Hu, J., Ying, Q., Zhang, H., Sherman, P., and McElroy, M. B.: Ozone pollution over China and India: seasonality and sources, *Atmos. Chem. Phys.*, 20, 4399-4414, <https://doi.org/10.5194/acp-20-4399-2020>, 2020b.

Gao, Y. and Zhang, M.: Sensitivity analysis of surface ozone to emission controls in Beijing and its neighboring area during the 2008 Olympic Games, *Journal of Environmental Sciences*, 24, 50-61, [https://doi.org/10.1016/S1001-0742\(11\)60728-6](https://doi.org/10.1016/S1001-0742(11)60728-6), 2012.

Gong, C. and Liao, H.: A typical weather pattern for ozone pollution events in North China, *Atmos. Chem. Phys.*, 19, 13725-13740, <https://doi.org/10.5194/acp-19-13725-2019>, 2019.

Gong, C., Liao, H., Yue, X., Ma, Y., and Lei, Y.: Impacts of Ozone-Vegetation Interactions on Ozone Pollution Episodes in North China and the Yangtze River Delta, *Geophysical Research Letters*, 48, e2021GL093814, <https://doi.org/10.1029/2021GL093814>, 2021.



Guo, H., Chen, K., Wang, P., Hu, J., Ying, Q., Gao, A., and Zhang, H.: Simulation of summer ozone and its sensitivity to emission changes in China, *Atmospheric Pollution Research*, 10, 1543-1552, <https://doi.org/10.1016/j.apr.2019.05.003>, 2019.

Guo, J., He, J., Liu, H., Miao, Y., Liu, H., and Zhai, P.: Impact of various emission control schemes on air quality using WRF-Chem during APEC China 2014, *Atmospheric Environment*, 140, 311-319, <https://doi.org/10.1016/j.atmosenv.2016.05.046>, 2016.

Guo, Y., Zhang, J., An, J., Qu, Y., Liu, X., Sun, Y., and Chen, Y.: Effect of vertical parameterization of a missing daytime source of HONO on concentrations of HONO, O<sub>3</sub> and secondary organic aerosols in eastern China, *Atmospheric Environment*, 226, 117208, <https://doi.org/10.1016/j.atmosenv.2019.117208>, 2020.

H., Matsui, M., Koike, Y., Kondo, N., Takegawa, K., and Kita: Spatial and temporal variations of aerosols around Beijing in summer 2006: Model evaluation and source apportionment, *Journal of Geophysical Research: Atmospheres*, 114, <https://doi.org/https://doi.org/10.1029/2008JD010906>, 2009.

Han, X., Zhang, M., Gao, J., Wang, S., and Chai, F.: Modeling analysis of the seasonal characteristics of haze formation in Beijing, *Atmos. Chem. Phys.*, 14, 10231-10248, <https://doi.org/10.5194/acp-14-10231-2014>, 2014.

Han, X., Zhu, L., Wang, S., Meng, X., Zhang, M., and Hu, J.: Modeling study of impacts on surface ozone of regional transport and emissions reductions over North China Plain in summer 2015, *Atmos. Chem. Phys.*, 18, 12207-12221, <https://doi.org/10.5194/acp-18-12207-2018>, 2018.

Han, X., Zhang, M., Tao, J., Wang, L., Gao, J., Wang, S., and Chai, F.: Modeling aerosol impacts on atmospheric visibility in Beijing with RAMS-CMAQ, *Atmospheric Environment*, 72, 177-191, <https://doi.org/10.1016/j.atmosenv.2013.02.030>, 2013.

He, J., Wang, Y., Hao, J., Shen, L., and Wang, L.: Variations of surface O<sub>3</sub> in August at a rural site near Shanghai: influences from the West Pacific subtropical high and anthropogenic emissions, *Environmental science and pollution research international*, 19, 4016-4029, <https://doi.org/10.1007/s11356-012-0970-5>, 2012.

Hong, C., Zhang, Q., Zhang, Y., Tang, Y., Tong, D., and He, K.: Multi-year downscaling application of two-way coupled WRF v3.4 and CMAQ v5.0.2 over east Asia for regional climate and air quality modeling: model evaluation and aerosol direct effects, *Geosci. Model Dev.*, 10, 2447-2470, <https://doi.org/10.5194/gmd-10-2447-2017>, 2017.

Hong, Y., Liu, Y., Chen, X., Fan, Q., Chen, C., Chen, X., and Wang, M.: The role of anthropogenic chlorine emission in surface ozone formation during different seasons over eastern China, *Sci. Total Environ.*, 723, 137697, <https://doi.org/10.1016/j.scitotenv.2020.137697>, 2020.

Hu, J., Chen, J., Ying, Q., and Zhang, H.: One-year simulation of ozone and particulate matter in China using WRF/CMAQ modeling system, *Atmos. Chem. Phys.*, 16, 10333-10350, <https://doi.org/10.5194/acp-16-10333-2016>, 2016.

Hu, J., Li, X., Huang, L., Ying, Q., Zhang, Q., Zhao, B., Wang, S., and Zhang, H.: Ensemble prediction of air quality using the WRF/CMAQ model system for health effect studies in China, *Atmos. Chem. Phys.*, 17, 13103-13118, <https://doi.org/10.5194/acp-17-13103-2017>, 2017.

Hu, J., Li, Y., Zhao, T., Liu, J., Hu, X. M., Liu, D., Jiang, Y., Xu, J., and Chang, L.: An important mechanism of regional O<sub>3</sub> transport for summer smog over the Yangtze River Delta in eastern China, *Atmos. Chem. Phys.*, 18, 16239-16251, <https://doi.org/10.5194/acp-18-16239-2018>, 2018.

Huang, C., Wang, T., Niu, T., Li, M., Liu, H., and Ma, C.: Study on the variation of air pollutant concentration and its formation mechanism during the COVID-19 period in Wuhan, *Atmospheric environment (Oxford, England : 1994)*, 251, 118276, <https://doi.org/10.1016/j.atmosenv.2021.118276>, 2021.

Huang, Z., Ou, J., Zheng, J., Yuan, Z., Yin, S., Chen, D., and Tan, H.: Process Contributions to Secondary Inorganic Aerosols during Typical Pollution Episodes over the Pearl River Delta Region, China, *Aerosol and Air Quality Research*, 16, 2129-2144, <https://doi.org/10.4209/aaqr.2015.12.0668>, 2016.

Itahashi, S., Hayami, H., and Uno, I.: Comprehensive study of emission source contributions for tropospheric ozone formation over East Asia, *Journal of Geophysical Research: Atmospheres*, 120, 331-358, <https://doi.org/10.1002/2014JD022117>, 2015.

Jeong, J. I. and Park, R. J.: Effects of the meteorological variability on regional air quality in East Asia, *Atmospheric Environment*, 69, 46-55, <https://doi.org/10.1016/j.atmosenv.2012.11.061>, 2013.

Jiang, F., Wang, T., Wang, T., Xie, M., and Zhao, H.: Numerical modeling of a continuous photochemical pollution episode in Hong Kong using WRF-chem, *Atmospheric Environment*, 42, 8717-8727, <https://doi.org/10.1016/j.atmosenv.2008.08.034>, 2008.

Jiang, Z., Li, J., Lu, X., Gong, C., Zhang, L., and Liao, H.: Impact of western Pacific subtropical high on ozone pollution over eastern China, *Atmos. Chem. Phys.*, 21, 2601-2613, <https://doi.org/10.5194/acp-21-2601-2021>, 2021.

Kwok, R. H. F., Fung, J. C. H., Lau, A. K. H., and Fu, J. S.: Numerical study on seasonal variations of gaseous pollutants and particulate matters in Hong Kong and Pearl River Delta Region, *Journal of Geophysical Research: Atmospheres*, 115, <https://doi.org/10.1029/2009JD012809>, 2010.

Leung, D. M., Shi, H., Zhao, B., Wang, J., Ding, E. M., Gu, Y., Zheng, H., Chen, G., Liou, K.-N., Wang, S., Fast, J. D., Zheng, G., Jiang, J., Li, X., and Jiang, J. H.: Wintertime Particulate Matter Decrease Buffered by Unfavorable Chemical Processes Despite Emissions Reductions in China, *Geophysical Research Letters*, 47, e2020GL087721, <https://doi.org/10.1029/2020GL087721>, 2020.

Li, G., Bei, N., Cao, J., Wu, J., Long, X., Feng, T., Dai, W., Liu, S., Zhang, Q., and Tie, X.: Widespread and persistent ozone pollution in eastern China during the non-winter season of 2015: observations and source attributions, *Atmos. Chem. Phys.*, 17, 2759-2774, <https://doi.org/10.5194/acp-17-2759-2017>, 2017a.

Li, J., Wang, Z., Akimoto, H., Gao, C., Pochanart, P., and Wang, X.: Modeling study of ozone seasonal cycle in lower troposphere over east Asia, *Journal of Geophysical Research: Atmospheres*, 112, <https://doi.org/10.1029/2006JD008209>, 2007.

Li, J., Cai, J., Zhang, M., Liu, H., Han, X., Cai, X., and Xu, Y.: Model analysis of meteorology and emission impacts on springtime surface ozone in Shandong, *Sci. Total Environ.*, 771, 144784, <https://doi.org/10.1016/j.scitotenv.2020.144784>, 2021a.

Li, J., Wang, Z., Akimoto, H., Yamaji, K., Takigawa, M., Pochanart, P., Liu, Y., Tanimoto, H., and Kanaya, Y.: Near-ground ozone source attributions and outflow in central eastern China during MTX2006, *Atmos. Chem. Phys.*, 8, 7335-7351, <https://doi.org/10.5194/acp-8-7335-2008>, 2008.

Li, J., Wang, Z., Chen, L., Lian, L., Li, Y., Zhao, L., Zhou, S., Mao, X., Huang, T., Gao, H., and Ma, J.: WRF-Chem simulations of ozone pollution and control strategy in petrochemical industrialized and heavily polluted Lanzhou City, Northwestern China, *Sci. Total Environ.*, 737, 139835, <https://doi.org/10.1016/j.scitotenv.2020.139835>, 2020a.

Li, J., Wang, Z., Wang, X., Yamaji, K., Takigawa, M., Kanaya, Y., Pochanart, P., Liu, Y., Irie, H., Hu, B., Tanimoto, H., and Akimoto, H.: Impacts of aerosols on summertime tropospheric photolysis frequencies and photochemistry over Central Eastern China, *Atmospheric Environment*, 45, 1817-1829, <https://doi.org/10.1016/j.atmosenv.2011.01.016>, 2011a.

- Li, K., Jacob, D. J., Liao, H., Qiu, Y., Shen, L., Zhai, S., Bates, K. H., Sulprizio, M. P., Song, S., Lu, X., Zhang, Q., Zheng, B., Zhang, Y., Zhang, J., Lee, H. C., and Kuk, S. K.: Ozone pollution in the North China Plain spreading into the late-winter haze season, *Proceedings of the National Academy of Sciences*, 118, <https://doi.org/10.1073/pnas.2015797118>, 2021b.
- Li, L., An, J., Huang, L., Yan, R., Huang, C., and Yarwood, G.: Ozone source apportionment over the Yangtze River Delta region, China: Investigation of regional transport, sectoral contributions and seasonal differences, *Atmospheric Environment*, 202, 269-280, <https://doi.org/10.1016/j.atmosenv.2019.01.028>, 2019.
- Li, L., An, J. Y., Shi, Y. Y., Zhou, M., Yan, R. S., Huang, C., Wang, H. L., Lou, S. R., Wang, Q., Lu, Q., and Wu, J.: Source apportionment of surface ozone in the Yangtze River Delta, China in the summer of 2013, *Atmospheric Environment*, 144, 194-207, <https://doi.org/10.1016/j.atmosenv.2016.08.076>, 2016a.
- Li, L., Chen, C. H., Huang, C., Huang, H. Y., Zhang, G. F., Wang, Y. J., Wang, H. L., Lou, S. R., Qiao, L. P., Zhou, M., Chen, M. H., Chen, Y. R., Streets, D. G., Fu, J. S., and Jang, C. J.: Process analysis of regional ozone formation over the Yangtze River Delta, China using the Community Multi-scale Air Quality modeling system, *Atmos. Chem. Phys.*, 12, 10971-10987, <https://doi.org/10.5194/acp-12-10971-2012>, 2012.
- Li, M., Song, Y., Mao, Z., Liu, M., and Huang, X.: Impacts of thermal circulations induced by urbanization on ozone formation in the Pearl River Delta region, China, *Atmospheric Environment*, 127, 382-392, <https://doi.org/10.1016/j.atmosenv.2015.10.075>, 2016b.
- Li, M., Wang, T., Han, Y., Xie, M., Li, S., Zhuang, B., and Chen, P.: Modeling of a severe dust event and its impacts on ozone photochemistry over the downstream Nanjing megacity of eastern China, *Atmospheric Environment*, 160, 107-123, <https://doi.org/10.1016/j.atmosenv.2017.04.010>, 2017b.
- Li, N., Chen, J.-P., Tsai, I. C., He, Q., Chi, S.-Y., Lin, Y.-C., and Fu, T.-M.: Potential impacts of electric vehicles on air quality in Taiwan, *Sci. Total Environ.*, 566-567, 919-928, <https://doi.org/10.1016/j.scitotenv.2016.05.105>, 2016c.
- Li, N., He, Q., Greenberg, J., Guenther, A., Li, J., Cao, J., Wang, J., Liao, H., Wang, Q., and Zhang, Q.: Impacts of biogenic and anthropogenic emissions on summertime ozone formation in the Guanzhong Basin, China, *Atmos. Chem. Phys.*, 18, 7489-7507, <https://doi.org/10.5194/acp-18-7489-2018>, 2018a.
- Li, P., Wang, L., Guo, P., Yu, S., Mehmood, K., Wang, S., Liu, W., Seinfeld, J. H., Zhang, Y., Wong, D. C., Alapaty, K., Pleim, J., and Mathur, R.: High reduction of ozone and particulate matter during the 2016 G-20 summit in Hangzhou by forced emission controls of industry and

traffic, *Environmental Chemistry Letters*, 15, 709-715, <https://doi.org/10.1007/s10311-017-0642-2>, 2017c.

Li, Q., Zhang, L., Wang, T., Tham, Y. J., Ahmadov, R., Xue, L., Zhang, Q., and Zheng, J.: Impacts of heterogeneous uptake of dinitrogen pentoxide and chlorine activation on ozone and reactive nitrogen partitioning: improvement and application of the WRF-Chem model in southern China, *Atmos. Chem. Phys.*, 16, 14875-14890, <https://doi.org/10.5194/acp-16-14875-2016>, 2016d.

Li, S., Zhang, Y., Zhao, J., Sarwar, G., Zhou, S., Chen, Y., Yang, G., and Saiz-Lopez, A.: Regional and Urban-Scale Environmental Influences of Oceanic DMS Emissions over Coastal China Seas, *Atmosphere*, 11, 849, <https://doi.org/10.3390/atmos11080849>, 2020b.

Li, X., Bei, N., Hu, B., Wu, J., Pan, Y., Wen, T., Liu, Z., Liu, L., Wang, R., and Li, G.: Mitigating NOX emissions does not help alleviate wintertime particulate pollution in Beijing-Tianjin-Hebei, China, *Environmental Pollution*, 279, 116931, <https://doi.org/10.1016/j.envpol.2021.116931>, 2021c.

Li, X., Wu, J., Elser, M., Feng, T., Cao, J., El-Haddad, I., Huang, R., Tie, X., Prévôt, A. S. H., and Li, G.: Contributions of residential coal combustion to the air quality in Beijing-Tianjin-Hebei (BTH), China: a case study, *Atmos. Chem. Phys.*, 18, 10675-10691, <https://doi.org/10.5194/acp-18-10675-2018>, 2018b.

Li, Y., Lau, A. K. H., Fung, J. C. H., Ma, H., and Tse, Y.: Systematic evaluation of ozone control policies using an Ozone Source Apportionment method, *Atmospheric Environment*, 76, 136-146, <https://doi.org/10.1016/j.atmosenv.2013.02.033>, 2013.

Li, Y., An, J., Min, M., Zhang, W., Wang, F., and Xie, P.: Impacts of HONO sources on the air quality in Beijing, Tianjin and Hebei Province of China, *Atmospheric Environment*, 45, 4735-4744, <https://doi.org/10.1016/j.atmosenv.2011.04.086>, 2011b.

Liao, J., Wang, T., Wang, X., Xie, M., Jiang, Z., Huang, X., and Zhu, J.: Impacts of different urban canopy schemes in WRF/Chem on regional climate and air quality in Yangtze River Delta, China, *Atmospheric Research*, 145-146, 226-243, <https://doi.org/10.1016/j.atmosres.2014.04.005>, 2014.

Liao, J., Wang, T., Jiang, Z., Zhuang, B., Xie, M., Yin, C., Wang, X., Zhu, J., Fu, Y., and Zhang, Y.: WRF/Chem modeling of the impacts of urban expansion on regional climate and air pollutants in Yangtze River Delta, China, *Atmospheric Environment*, 106, 204-214, <https://doi.org/10.1016/j.atmosenv.2015.01.059>, 2015.

- Lin, J., An, J., Qu, Y., Chen, Y., Li, Y., Tang, Y., Wang, F., and Xiang, W.: Local and distant source contributions to secondary organic aerosol in the Beijing urban area in summer, *Atmospheric Environment*, 124, 176-185, <https://doi.org/10.1016/j.atmosenv.2015.08.098>, 2016.
- Lin, M., Holloway, T., Oki, T., Streets, D., and A, R.: Multi-scale model analysis of boundary layer ozone over East Asia, *Atmospheric Chemistry and Physics*, 9, <https://doi.org/10.5194/acp-9-3277-2009>, 2009.
- Liu, C., Huang, J., Hu, X.-M., Hu, C., Wang, Y., Fang, X., Luo, L., Xiao, H.-W., and Xiao, H.-Y.: Evaluation of WRF-Chem simulations on vertical profiles of PM<sub>2.5</sub> with UAV observations during a haze pollution event, *Atmospheric Environment*, 252, 118332, <https://doi.org/10.1016/j.atmosenv.2021.118332>, 2021.
- Liu, H., Zhang, M., Han, X., Li, J., and Chen, L.: Episode analysis of regional contributions to tropospheric ozone in Beijing using a regional air quality model, *Atmospheric Environment*, 199, 299-312, <https://doi.org/10.1016/j.atmosenv.2018.11.044>, 2019a.
- Liu, H., Liu, S., Xue, B., Lv, Z., Meng, Z., Yang, X., Xue, T., Yu, Q., and He, K.: Ground-level ozone pollution and its health impacts in China, *Atmospheric Environment*, 173, 223-230, <https://doi.org/10.1016/j.atmosenv.2017.11.014>, 2018a.
- Liu, L., Wu, J., Liu, S., Li, X., Zhou, J., Feng, T., Qian, Y., Cao, J., Tie, X., and Li, G.: Effects of organic coating on the nitrate formation by suppressing the N<sub>2</sub>O<sub>5</sub> heterogeneous hydrolysis: a case study during wintertime in Beijing–Tianjin–Hebei (BTH), *Atmos. Chem. Phys.*, 19, 8189-8207, <https://doi.org/10.5194/acp-19-8189-2019>, 2019b.
- Liu, L., Bei, N., Wu, J., Liu, S., Zhou, J., Li, X., Yang, Q., Feng, T., Cao, J., Tie, X., and Li, G.: Effects of stabilized Criegee intermediates (sCIs) on sulfate formation: a sensitivity analysis during summertime in Beijing–Tianjin–Hebei (BTH), China, *Atmos. Chem. Phys.*, 19, 13341-13354, <https://doi.org/10.5194/acp-19-13341-2019>, 2019c.
- Liu, T., Wang, C., Wang, Y., Huang, L., Li, J., Xie, F., Zhang, J., and Hu, J.: Impacts of model resolution on predictions of air quality and associated health exposure in Nanjing, China, *Chemosphere*, 249, 126515, <https://doi.org/10.1016/j.chemosphere.2020.126515>, 2020.
- Liu, X.-H., Zhang, Y., Cheng, S.-H., Xing, J., Zhang, Q., Streets, D. G., Jang, C., Wang, W.-X., and Hao, J.-M.: Understanding of regional air pollution over China using CMAQ, part I performance evaluation and seasonal variation, *Atmospheric Environment*, 44, 2415-2426, <https://doi.org/10.1016/j.atmosenv.2010.03.035>, 2010.

Liu, Y. and Wang, T.: Worsening urban ozone pollution in China from 2013 to 2017 – Part 1: The complex and varying roles of meteorology, *Atmos. Chem. Phys.*, 20, 6305-6321, <https://doi.org/10.5194/acp-20-6305-2020>, 2020.

Liu, Y., Li, L., An, J., Huang, L., Yan, R., Huang, C., Wang, H., Wang, Q., Wang, M., and Zhang, W.: Estimation of biogenic VOC emissions and its impact on ozone formation over the Yangtze River Delta region, China, *Atmospheric Environment*, 186, 113-128, <https://doi.org/10.1016/j.atmosenv.2018.05.027>, 2018b.

Liu, F., Beirle, S., Zhang, Q., van der A, R. J., Zheng, B., Tong, D., and He, K.: NO<sub>x</sub> emission trends over Chinese cities estimated from OMI observations during 2005 to 2015, *Atmos. Chem. Phys.*, 17, 9261-9275, <https://doi.org/10.5194/acp-17-9261-2017>, 2017.

Long, X., Tie, X., Cao, J., Huang, R., Feng, T., Li, N., Zhao, S., Tian, J., Li, G., and Zhang, Q.: Impact of crop field burning and mountains on heavy haze in the North China Plain: a case study, *Atmos. Chem. Phys.*, 16, 9675-9691, <https://doi.org/10.5194/acp-16-9675-2016>, 2016.

Lou, S., Liao, H., and Zhu, B.: Impacts of aerosols on surface-layer ozone concentrations in China through heterogeneous reactions and changes in photolysis rates, *Atmospheric Environment*, 85, 123-138, <https://doi.org/10.1016/j.atmosenv.2013.12.004>, 2014.

Lou, S., Liao, H., Yang, Y., and Mu, Q.: Simulation of the interannual variations of tropospheric ozone over China: Roles of variations in meteorological parameters and anthropogenic emissions, *Atmospheric Environment*, 122, 839-851, <https://doi.org/10.1016/j.atmosenv.2015.08.081>, 2015.

Lu, X., Yao, T., Li, Y., Fung, J. C. H., and Lau, A. K. H.: Source apportionment and health effect of NO<sub>x</sub> over the Pearl River Delta region in southern China, *Environmental Pollution*, 212, 135-146, <https://doi.org/10.1016/j.envpol.2016.01.056>, 2016.

Lu, X., Chen, Y., Huang, Y., Lin, C., Li, Z., Fung, J. C. H., and Lau, A. K. H.: Differences in concentration and source apportionment of PM<sub>2.5</sub> between 2006 and 2015 over the PRD region in southern China, *Sci. Total Environ.*, 673, 708-718, <https://doi.org/10.1016/j.scitotenv.2019.03.452>, 2019a.

Lu, X., Zhang, L., Chen, Y., Zhou, M., Zheng, B., Li, K., Liu, Y., Lin, J., Fu, T. M., and Zhang, Q.: Exploring 2016–2017 surface ozone pollution over China: source contributions and meteorological influences, *Atmos. Chem. Phys.*, 19, 8339-8361, <https://doi.org/10.5194/acp-19-8339-2019>, 2019b.

Ma, C., Wang, T., Zang, Z., and Li, Z.: Comparisons of Three-Dimensional Variational Data Assimilation and Model Output Statistics in Improving Atmospheric Chemistry Forecasts, *Advances in Atmospheric Sciences*, 35, 813-825, <https://doi.org/10.1007/s00376-017-7179-y>, 2018.

Ma, S., Shao, M., Zhang, Y., Dai, Q., and Xie, M.: Sensitivity of PM<sub>2.5</sub> and O<sub>3</sub> pollution episodes to meteorological factors over the North China Plain, *Sci. Total Environ.*, 792, 148474, <https://doi.org/10.1016/j.scitotenv.2021.148474>, 2021.

Ni, R., Lin, J., Yan, Y., and Lin, W.: Foreign and domestic contributions to springtime ozone over China, *Atmos. Chem. Phys.*, 18, 11447-11469, <https://doi.org/10.5194/acp-18-11447-2018>, 2018.

Ni, Z.-Z., Luo, K., Gao, X., Gao, Y., Fan, J.-R., Fu, J., and Chen, C.-H.: Exploring the stratospheric source of ozone pollution over China during the 2016 Group of Twenty summit, *Atmospheric Pollution Research*, 10, 1267-1275, <https://doi.org/10.1016/j.apr.2019.02.010>, 2019.

Ni, Z. Z., Luo, K., Gao, Y., Gao, X., Jiang, F., Huang, C., Fan, J. R., Fu, J. S., and Chen, C. H.: Spatial-temporal variations and process analysis of O<sub>3</sub> pollution in Hangzhou during the G20 summit, *Atmos. Chem. Phys.*, 20, 5963-5976, <https://doi.org/10.5194/acp-20-5963-2020>, 2020.

Peng, Y.-P., Chen, K.-S., Wang, H.-K., Lai, C.-H., Lin, M.-H., and Lee, C.-H.: Applying model simulation and photochemical indicators to evaluate ozone sensitivity in southern Taiwan, *Journal of Environmental Sciences*, 23, 790-797, [https://doi.org/10.1016/S1001-0742\(10\)60479-2](https://doi.org/10.1016/S1001-0742(10)60479-2), 2011.

Peng, Z., Lei, L., Liu, Z., Sun, J., Ding, A., Ban, J., Chen, D., Kou, X., and Chu, K.: The impact of multi-species surface chemical observation assimilation on air quality forecasts in China, *Atmos. Chem. Phys.*, 18, 17387-17404, <https://doi.org/10.5194/acp-18-17387-2018>, 2018.

Qiao, X., Wang, P., Zhang, J., Zhang, H., Tang, Y., Hu, J., and Ying, Q.: Spatial-temporal variations and source contributions to forest ozone exposure in China, *Sci. Total Environ.*, 674, 189-199, <https://doi.org/10.1016/j.scitotenv.2019.04.106>, 2019a.

Qiao, X., Guo, H., Wang, P., Tang, Y., Ying, Q., Zhao, X., Deng, W., and Zhang, H.: Fine Particulate Matter and Ozone Pollution in the 18 Cities of the Sichuan Basin in Southwestern China: Model Performance and Characteristics, *Aerosol and Air Quality Research*, 19, 2308-2319, <https://doi.org/10.4209/aaqr.2019.05.0235>, 2019b.



Qiao, X., Liu, L., Yang, C., Yuan, Y., Zhang, M., Guo, H., Tang, Y., Ying, Q., Zhu, S., and Zhang, H.: Responses of fine particulate matter and ozone to local emission reductions in the Sichuan Basin, southwestern China, *Environmental Pollution*, 277, 116793, <https://doi.org/10.1016/j.envpol.2021.116793>, 2021.

Qin, M., Wang, X., Hu, Y., Huang, X., He, L., Zhong, L., Song, Y., Hu, M., and Zhang, Y.: Formation of particulate sulfate and nitrate over the Pearl River Delta in the fall: Diagnostic analysis using the Community Multiscale Air Quality model, *Atmospheric Environment*, 112, 81-89, <https://doi.org/10.1016/j.atmosenv.2015.04.027>, 2015.

Qiu, X., Ying, Q., Wang, S., Duan, L., Wang, Y., Lu, K., Wang, P., Xing, J., Zheng, M., Zhao, M., Zheng, H., Zhang, Y., and Hao, J.: Significant impact of heterogeneous reactions of reactive chlorine species on summertime atmospheric ozone and free-radical formation in north China, *Sci. Total Environ.*, 693, 133580, <https://doi.org/10.1016/j.scitotenv.2019.133580>, 2019a.

Qiu, X., Ying, Q., Wang, S., Duan, L., Zhao, J., Xing, J., Ding, D., Sun, Y., Liu, B., Shi, A., Yan, X., Xu, Q., and Hao, J.: Modeling the impact of heterogeneous reactions of chlorine on summertime nitrate formation in Beijing, China, *Atmos. Chem. Phys.*, 19, 6737-6747, <https://doi.org/10.5194/acp-19-6737-2019>, 2019b.

Qiu, Y., Ma, Z., and Li, K.: A modeling study of the peroxyacetyl nitrate (PAN) during a wintertime haze event in Beijing, China, *Sci. Total Environ.*, 650, 1944-1953, <https://doi.org/10.1016/j.scitotenv.2018.09.253>, 2019c.

Qiu, Y., Liao, H., Zhang, R., and Hu, J.: Simulated impacts of direct radiative effects of scattering and absorbing aerosols on surface layer aerosol concentrations in China during a heavily polluted event in February 2014, *Journal of Geophysical Research: Atmospheres*, 122, 5955-5975, <https://doi.org/10.1002/2016JD026309>, 2017.

Qiu, Y., Ma, Z., Li, K., Lin, W., Tang, Y., Dong, F., and Liao, H.: Markedly Enhanced Levels of Peroxyacetyl Nitrate (PAN) During COVID-19 in Beijing, *Geophysical Research Letters*, 47, e2020GL089623, <https://doi.org/10.1029/2020GL089623>, 2020.

Qu, K., Wang, X., Yan, Y., Shen, J., Xiao, T., Dong, H., Zeng, L., and Zhang, Y.: A comparative study to reveal the influence of typhoons on the transport, production and accumulation of O<sub>3</sub> in the Pearl River Delta, China, *Atmos. Chem. Phys.*, 21, 11593-11612, <https://doi.org/10.5194/acp-21-11593-2021>, 2021.

Qu, Y., An, J., Li, J., Chen, Y., Li, Y., Liu, X., and Hu, M.: Effects of NO<sub>x</sub> and VOCs from five emission sources on summer surface O<sub>3</sub> over the Beijing-Tianjin-Hebei region,

Advances in Atmospheric Sciences, 31, 787-800, <https://doi.org/10.1007/s00376-013-3132-x>, 2014.

Qu, Y., Wang, T., Wu, H., Shu, L., Li, M., Chen, P., Zhao, M., Li, S., Xie, M., Zhuang, B., Liu, J., and Han, Y.: Vertical structure and interaction of ozone and fine particulate matter in spring at Nanjing, China: The role of aerosol's radiation feedback, *Atmospheric Environment*, 222, 117162, <https://doi.org/10.1016/j.atmosenv.2019.117162>, 2020.

Sahu, S. K., Liu, S., Liu, S., Ding, D., and Xing, J.: Ozone pollution in China: Background and transboundary contributions to ozone concentration & related health effects across the country, *Sci. Total Environ.*, 761, 144131, <https://doi.org/10.1016/j.scitotenv.2020.144131>, 2021.

Shen, H., Sun, Z., Chen, Y., Russell, A. G., Hu, Y., Odman, M. T., Qian, Y., Archibald, A. T., and Tao, S.: Novel Method for Ozone Isopleth Construction and Diagnosis for the Ozone Control Strategy of Chinese Cities, *Environmental Science & Technology*, 55, 15625-15636, <https://doi.org/10.1021/acs.est.1c01567>, 2021.

Shi, L., Zhu, A., Huang, L., Yaluk, E., Gu, Y., Wang, Y., Wang, S., Chan, A., and Li, L.: Impact of the planetary boundary layer on air quality simulations over the Yangtze River Delta region, China, *Atmospheric Environment*, 263, 118685, <https://doi.org/10.1016/j.atmosenv.2021.118685>, 2021.

Shu, L., Xie, M., Wang, T., Gao, D., Chen, P., Han, Y., Li, S., Zhuang, B., and Li, M.: Integrated studies of a regional ozone pollution synthetically affected by subtropical high and typhoon system in the Yangtze River Delta region, China, *Atmos. Chem. Phys.*, 16, 15801-15819, <https://doi.org/10.5194/acp-16-15801-2016>, 2016.

Sicard, P., Crippa, P., De Marco, A., Castruccio, S., Giani, P., Cuesta, J., Paoletti, E., Feng, Z., and Anav, A.: High spatial resolution WRF-Chem model over Asia: Physics and chemistry evaluation, *Atmospheric Environment*, 244, 118004, <https://doi.org/10.1016/j.atmosenv.2020.118004>, 2021.

Su, F., Xu, Q., Wang, K., Yin, S., Wang, S., Zhang, R., Tang, X., and Ying, Q.: On the effectiveness of short-term intensive emission controls on ozone and particulate matter in a heavily polluted megacity in central China, *Atmospheric Environment*, 246, 118111, <https://doi.org/10.1016/j.atmosenv.2020.118111>, 2021.

Su, X., Tie, X., Li, G., Cao, J., Huang, R., Feng, T., Long, X., and Xu, R.: Effect of hydrolysis of N<sub>2</sub>O<sub>5</sub> on nitrate and ammonium formation in Beijing China: WRF-Chem model simulation, *Sci. Total Environ.*, 579, 221-229, <https://doi.org/10.1016/j.scitotenv.2016.11.125>, 2017.

Sun, J., Shen, Z., Wang, R., Li, G., Zhang, Y., Zhang, B., He, K., Tang, Z., Xu, H., Qu, L., Sai Hang Ho, S., Liu, S., and Cao, J.: A comprehensive study on ozone pollution in a megacity in North China Plain during summertime: Observations, source attributions and ozone sensitivity, *Environment international*, 146, 106279, <https://doi.org/10.1016/j.envint.2020.106279>, 2021a.

Sun, L., Xue, L., Wang, Y., Li, L., Lin, J., Ni, R., Yan, Y., Chen, L., Li, J., Zhang, Q., and Wang, W.: Impacts of meteorology and emissions on summertime surface ozone increases over central eastern China between 2003 and 2015, *Atmos. Chem. Phys.*, 19, 1455-1469, <https://doi.org/10.5194/acp-19-1455-2019>, 2019.

Sun, Y., Yin, H., Lu, X., Notholt, J., Palm, M., Liu, C., Tian, Y., and Zheng, B.: The drivers and health risks of unexpected surface ozone enhancements over the Sichuan Basin, China, in 2020, *Atmos. Chem. Phys.*, 21, 18589-18608, <https://doi.org/10.5194/acp-21-18589-2021>, 2021b.

Tang, G., Zhu, X., Xin, J., Hu, B., Song, T., Sun, Y., Wang, L., Wu, F., Sun, J., Cheng, M., Chao, N., Li, X., and Wang, Y.: Modelling study of boundary-layer ozone over northern China - Part II: Responses to emission reductions during the Beijing Olympics, *Atmospheric Research*, 193, 83-93, <https://doi.org/10.1016/j.atmosres.2017.02.014>, 2017a.

Tang, G., Zhu, X., Xin, J., Hu, B., Song, T., Sun, Y., Zhang, J., Wang, L., Cheng, M., Chao, N., Kong, L., Li, X., and Wang, Y.: Modelling study of boundary-layer ozone over northern China - Part I: Ozone budget in summer, *Atmospheric Research*, 187, 128-137, <https://doi.org/10.1016/j.atmosres.2016.10.017>, 2017b.

Tang, Y., An, J., Wang, F., Li, Y., Qu, Y., Chen, Y., and Lin, J.: Impacts of an unknown daytime HONO source on the mixing ratio and budget of HONO, and hydroxyl, hydroperoxyl, and organic peroxy radicals, in the coastal regions of China, *Atmos. Chem. Phys.*, 15, 9381-9398, <https://doi.org/10.5194/acp-15-9381-2015>, 2015.

Tao, H., Xing, J., Zhou, H., Chang, X., Li, G., Chen, L., and Li, J.: Impacts of land use and land cover change on regional meteorology and air quality over the Beijing-Tianjin-Hebei region, China, *Atmospheric Environment*, 189, 9-21, <https://doi.org/10.1016/j.atmosenv.2018.06.033>, 2018.

Tao, W., Liu, J., Ban-Weiss, G. A., Hauglustaine, D. A., Zhang, L., Zhang, Q., Cheng, Y., Yu, Y., and Tao, S.: Effects of urban land expansion on the regional meteorology and air quality of eastern China, *Atmos. Chem. Phys.*, 15, 8597-8614, <https://doi.org/10.5194/acp-15-8597-2015>, 2015.

Tie, X., Geng, F., Guenther, A., Cao, J., Greenberg, J., Zhang, R., Apel, E., Li, G., Weinheimer, A., Chen, J., and Cai, C.: Megacity impacts on regional ozone formation: observations and WRF-Chem modeling for the MIRAGE-Shanghai field campaign, *Atmos. Chem. Phys.*, 13, 5655-5669, <https://doi.org/10.5194/acp-13-5655-2013>, 2013.

Wai, K.-M. and Tanner, P. A.: Recent Springtime Regional CO Variability in Southern China and the Adjacent Ocean: Anthropogenic and Biomass Burning Contribution, *Aerosol and Air Quality Research*, 14, 21-32, <https://doi.org/10.4209/aaqr.2013.05.0159>, 2014.

Wang, F., Li, Q., and Wang, Y.: Lake-atmosphere exchange impacts ozone simulation around a large shallow lake with large cities, *Atmospheric Environment*, 246, 118086, <https://doi.org/10.1016/j.atmosenv.2020.118086>, 2021a.

Wang, P., Zhang, Y., Gong, H., Zhang, H., Guenther, A., Zeng, J., Wang, T., and Wang, X.: Updating Biogenic Volatile Organic Compound (BVOC) Emissions With Locally Measured Emission Factors in South China and the Effect on Modeled Ozone and Secondary Organic Aerosol Production, *Journal of Geophysical Research: Atmospheres*, 128, e2023JD039928, <https://doi.org/10.1029/2023JD039928>, 2023.

Wang, F., An, J., Li, Y., Tang, Y., Lin, J., Qu, Y., Chen, Y., Zhang, B., and Zhai, J.: Impacts of uncertainty in AVOC emissions on the summer ROx budget and ozone production rate in the three most rapidly-developing economic growth regions of China, *Advances in Atmospheric Sciences*, 31, 1331-1342, <https://doi.org/10.1007/s00376-014-3251-z>, 2014.

Wang, H., Sui, W., Tang, X., Lu, M., Wu, H., Kong, L., Han, L., Wu, L., Wang, W., and Wang, Z.: Simulation-based Design of Regional Emission Control Experiments with Simultaneous Pollution of O<sub>3</sub> and PM<sub>2.5</sub> in Jinan, China, *Aerosol and Air Quality Research*, 19, 2543-2556, <https://doi.org/10.4209/aaqr.2019.03.0125>, 2019a.

Wang, J., Allen, D. J., Pickering, K. E., Li, Z., and He, H.: Impact of aerosol direct effect on East Asian air quality during the EAST-AIRE campaign, *Journal of Geophysical Research: Atmospheres*, 121, 6534-6554, <https://doi.org/10.1002/2016JD025108>, 2016a.

Wang, K., Tong, Y., Gao, J., Gao, C., Wu, K., Yue, T., Qin, S., and Wang, C.: Impacts of LULC, FDDA, Topo-wind and UCM schemes on WRF-CMAQ over the Beijing-Tianjin-Hebei region, China, *Atmospheric Pollution Research*, 12, 292-304, <https://doi.org/10.1016/j.apr.2020.11.011>, 2021b.

Wang, M. Y., Yim, S. H. L., Wong, D. C., and Ho, K. F.: Source contributions of surface ozone in China using an adjoint sensitivity analysis, *Sci. Total Environ.*, 662, 385-392, <https://doi.org/10.1016/j.scitotenv.2019.01.116>, 2019b.

Wang, N., Guo, H., Jiang, F., Ling, Z. H., and Wang, T.: Simulation of ozone formation at different elevations in mountainous area of Hong Kong using WRF-CMAQ model, *Sci. Total Environ.*, 505, 939-951, <https://doi.org/10.1016/j.scitotenv.2014.10.070>, 2015.

Wang, N., Lyu, X., Deng, X., Huang, X., Jiang, F., and Ding, A.: Aggravating O<sub>3</sub> pollution due to NO<sub>x</sub> emission control in eastern China, *Sci. Total Environ.*, 677, 732-744, <https://doi.org/10.1016/j.scitotenv.2019.04.388>, 2019c.

Wang, N., Lyu, X. P., Deng, X. J., Guo, H., Deng, T., Li, Y., Yin, C. Q., Li, F., and Wang, S. Q.: Assessment of regional air quality resulting from emission control in the Pearl River Delta region, southern China, *Sci. Total Environ.*, 573, 1554-1565, <https://doi.org/10.1016/j.scitotenv.2016.09.013>, 2016b.

Wang, P., Qiao, X., and Zhang, H.: Modeling PM<sub>2.5</sub> and O<sub>3</sub> with aerosol feedbacks using WRF/Chem over the Sichuan Basin, southwestern China, *Chemosphere*, 254, 126735, <https://doi.org/10.1016/j.chemosphere.2020.126735>, 2020.

Wang, P., Chen, Y., Hu, J., Zhang, H., and Ying, Q.: Source apportionment of summertime ozone in China using a source-oriented chemical transport model, *Atmospheric Environment*, 211, 79-90, <https://doi.org/10.1016/j.atmosenv.2019.05.006>, 2019d.

Wang, P., Liu, Y., Dai, J., Fu, X., Wang, X., Guenther, A., and Wang, T.: Isoprene Emissions Response to Drought and the Impacts on Ozone and SOA in China, *Journal of Geophysical Research: Atmospheres*, 126, e2020JD033263, <https://doi.org/10.1029/2020JD033263>, 2021c.

Wang, R., Tie, X., Li, G., Zhao, S., Long, X., Johansson, L., and An, Z.: Effect of ship emissions on O<sub>3</sub> in the Yangtze River Delta region of China: Analysis of WRF-Chem modeling, *Sci. Total Environ.*, 683, 360-370, <https://doi.org/10.1016/j.scitotenv.2019.04.240>, 2019e.

Wang, S., Zheng, J., Fu, F., Yin, S., and Zhong, L.: Development of an emission processing system for the Pearl River Delta Regional air quality modeling using the SMOKE model: Methodology and evaluation, *Atmospheric Environment*, 45, 5079-5089, <https://doi.org/10.1016/j.atmosenv.2011.06.037>, 2011a.

Wang, T., Zhang, L., Zhou, S., Zhang, T., Zhai, S., Yang, Z., Wang, D., and Song, H.: Effects of ground-level ozone pollution on yield and economic losses of winter wheat in Henan, China, *Atmospheric Environment*, 262, 118654, <https://doi.org/10.1016/j.atmosenv.2021.118654>, 2021d.

Wang, X., Zhang, Y., Hu, Y., Zhou, W., Zeng, L., Hu, M., Cohan, D. S., and Russell, A. G.: Decoupled direct sensitivity analysis of regional ozone pollution over the Pearl River Delta

during the PRIDE-PRD2004 campaign, *Atmospheric Environment*, 45, 4941-4949, <https://doi.org/10.1016/j.atmosenv.2011.06.006>, 2011b.

Wang, X., Zhang, Y., Hu, Y., Zhou, W., Lu, K., Zhong, L., Zeng, L., Shao, M., Hu, M., and Russell, A. G.: Process analysis and sensitivity study of regional ozone formation over the Pearl River Delta, China, during the PRIDE-PRD2004 campaign using the Community Multiscale Air Quality modeling system, *Atmos. Chem. Phys.*, 10, 4423-4437, <https://doi.org/10.5194/acp-10-4423-2010>, 2010.

Wang, X., Li, L., Gong, K., Mao, J., Hu, J., Li, J., Liu, Z., Liao, H., Qiu, W., Yu, Y., Dong, H., Guo, S., Hu, M., Zeng, L., and Zhang, Y.: Modelling air quality during the EXPLORE-YRD campaign – Part I. Model performance evaluation and impacts of meteorological inputs and grid resolutions, *Atmospheric Environment*, 246, 118131, <https://doi.org/10.1016/j.atmosenv.2020.118131>, 2021e.

Wang, X., Fu, T.-M., Zhang, L., Cao, H., Zhang, Q., Ma, H., Shen, L., Evans, M. J., Ivatt, P. D., Lu, X., Chen, Y., Zhang, L., Feng, X., Yang, X., Zhu, L., and Henze, D. K.: Sensitivities of Ozone Air Pollution in the Beijing–Tianjin–Hebei Area to Local and Upwind Precursor Emissions Using Adjoint Modeling, *Environmental Science & Technology*, 55, 5752-5762, <https://doi.org/10.1021/acs.est.1c00131>, 2021f.

Wang, Y., Zhu, S., Ma, J., Shen, J., Wang, P., Wang, P., and Zhang, H.: Enhanced atmospheric oxidation capacity and associated ozone increases during COVID-19 lockdown in the Yangtze River Delta, *Sci. Total Environ.*, 768, 144796, <https://doi.org/10.1016/j.scitotenv.2020.144796>, 2021g.

Wang, H., Wu, Q., Guenther, A. B., Yang, X., Wang, L., Xiao, T., Li, J., Feng, J., Xu, Q., and Cheng, H.: A long-term estimation of biogenic volatile organic compound (BVOC) emission in China from 2001–2016: the roles of land cover change and climate variability, *Atmos. Chem. Phys.*, 21, 4825-4848, <https://doi.org/10.5194/acp-21-4825-2021>, 2021h.

Wang, Z., Li, J., Wang, X., Pochanart, P., and Akimoto, H.: Modeling of Regional High Ozone Episode Observed at Two Mountain Sites (Mt. Tai and Huang) in East China, *Journal of Atmospheric Chemistry*, 55, 253-272, <https://doi.org/10.1007/s10874-006-9038-6>, 2006.

Wei, W., Li, Y., Ren, Y., Cheng, S., and Han, L.: Sensitivity of summer ozone to precursor emission change over Beijing during 2010–2015: A WRF-Chem modeling study, *Atmospheric Environment*, 218, 116984, <https://doi.org/10.1016/j.atmosenv.2019.116984>, 2019.

Wei, W., Lv, Z. F., Li, Y., Wang, L. T., Cheng, S., and Liu, H.: A WRF-Chem model study of the impact of VOCs emission of a huge petro-chemical industrial zone on the summertime

ozone in Beijing, China, *Atmospheric Environment*, 175, 44-53, <https://doi.org/10.1016/j.atmosenv.2017.11.058>, 2018.

Wen, W., Guo, C., Ma, X., Zhao, X., Liu, L., Chen, D., and Xu, J.: Impact of emission reduction on aerosol-radiation interaction during heavy pollution periods over Beijing-Tianjin-Hebei region in China, *Journal of Environmental Sciences*, 95, 2-13, <https://doi.org/10.1016/j.jes.2020.03.025>, 2020.

Wu, C., Liu, L., Wang, G., Zhang, S., Li, G., Lv, S., Li, J., Wang, F., Meng, J., and Zeng, Y.: Important contribution of N<sub>2</sub>O<sub>5</sub> hydrolysis to the daytime nitrate in Xi'an, China during haze periods: Isotopic analysis and WRF-Chem model simulation, *Environmental Pollution*, 288, 117712, <https://doi.org/10.1016/j.envpol.2021.117712>, 2021.

Wu, J., Bei, N., Li, X., Cao, J., Feng, T., Wang, Y., Tie, X., and Li, G.: Widespread air pollutants of the North China Plain during the Asian summer monsoon season: a case study, *Atmos. Chem. Phys.*, 18, 8491-8504, <https://doi.org/10.5194/acp-18-8491-2018>, 2018.

Wu, J., Li, G., Cao, J., Bei, N., Wang, Y., Feng, T., Huang, R., Liu, S., Zhang, Q., and Tie, X.: Contributions of trans-boundary transport to summertime air quality in Beijing, China, *Atmos. Chem. Phys.*, 17, 2035-2051, <https://doi.org/10.5194/acp-17-2035-2017>, 2017.

Wu, K., Yang, X., Chen, D., Gu, S., Lu, Y., Jiang, Q., Wang, K., Ou, Y., Qian, Y., Shao, P., and Lu, S.: Estimation of biogenic VOC emissions and their corresponding impact on ozone and secondary organic aerosol formation in China, *Atmospheric Research*, 231, 104656, <https://doi.org/10.1016/j.atmosres.2019.104656>, 2020.

Wu, Q. Z., Wang, Z. F., Gbaguidi, A., Gao, C., Li, L. N., and Wang, W.: A numerical study of contributions to air pollution in Beijing during CAREBeijing-2006, *Atmos. Chem. Phys.*, 11, 5997-6011, <https://doi.org/10.5194/acp-11-5997-2011>, 2011.

Xie, M., Liao, J., Wang, T., Zhu, K., Zhuang, B., Han, Y., Li, M., and Li, S.: Modeling of the anthropogenic heat flux and its effect on regional meteorology and air quality over the Yangtze River Delta region, China, *Atmos. Chem. Phys.*, 16, 6071-6089, <https://doi.org/10.5194/acp-16-6071-2016>, 2016a.

Xie, M., Zhu, K., Wang, T., Feng, W., Gao, D., Li, M., Li, S., Zhuang, B., Han, Y., Chen, P., and Liao, J.: Changes in regional meteorology induced by anthropogenic heat and their impacts on air quality in South China, *Atmos. Chem. Phys.*, 16, 15011-15031, <https://doi.org/10.5194/acp-16-15011-2016>, 2016b.

Xing, J., Wang, S. X., Jang, C., Zhu, Y., and Hao, J. M.: Nonlinear response of ozone to precursor emission changes in China: a modeling study using response surface methodology, *Atmos. Chem. Phys.*, 11, 5027-5044, <https://doi.org/10.5194/acp-11-5027-2011>, 2011a.

Xing, J., Ding, D., Wang, S., Zhao, B., Jang, C., Wu, W., Zhang, F., Zhu, Y., and Hao, J.: Quantification of the enhanced effectiveness of NO<sub>x</sub> control from simultaneous reductions of VOC and NH<sub>3</sub> for reducing air pollution in the Beijing–Tianjin–Hebei region, China, *Atmos. Chem. Phys.*, 18, 7799-7814, <https://doi.org/10.5194/acp-18-7799-2018>, 2018.

Xing, J., Wang, J., Mathur, R., Wang, S., Sarwar, G., Pleim, J., Hogrefe, C., Zhang, Y., Jiang, J., Wong, D. C., and Hao, J.: Impacts of aerosol direct effects on tropospheric ozone through changes in atmospheric dynamics and photolysis rates, *Atmos. Chem. Phys.*, 17, 9869-9883, <https://doi.org/10.5194/acp-17-9869-2017>, 2017.

Xing, J., Zhang, Y., Wang, S., Liu, X., Cheng, S., Zhang, Q., Chen, Y., Streets, D. G., Jang, C., Hao, J., and Wang, W.: Modeling study on the air quality impacts from emission reductions and atypical meteorological conditions during the 2008 Beijing Olympics, *Atmospheric Environment*, 45, 1786-1798, <https://doi.org/10.1016/j.atmosenv.2011.01.025>, 2011b.

Xu, J., Tie, X., Gao, W., Lin, Y., and Fu, Q.: Measurement and model analyses of the ozone variation during 2006 to 2015 and its response to emission change in megacity Shanghai, China, *Atmos. Chem. Phys.*, 19, 9017-9035, <https://doi.org/10.5194/acp-19-9017-2019>, 2019.

Xu, J., Xu, X., Lin, W., Ma, Z., Ma, J., Wang, R., Wang, Y., Zhang, G., and Xu, W.: Understanding the formation of high-ozone episodes at Raoyang, a rural site in the north China plain, *Atmospheric Environment*, 240, 117797, <https://doi.org/10.1016/j.atmosenv.2020.117797>, 2020.

Yamaji, K., Li, J., Uno, I., Kanaya, Y., Irie, H., Takigawa, M., Komazaki, Y., Pochanart, P., Liu, Y., Tanimoto, H., Ohara, T., Yan, X., Wang, Z., and Akimoto, H.: Impact of open crop residual burning on air quality over Central Eastern China during the Mount Tai Experiment 2006 (MTX2006), *Atmos. Chem. Phys.*, 10, 7353-7368, <https://doi.org/10.5194/acp-10-7353-2010>, 2010.

Yan, Y., Zheng, H., Kong, S., Lin, J., Yao, L., Wu, F., Cheng, Y., Niu, Z., Zheng, S., Zeng, X., Yan, Q., Wu, J., Zheng, M., Liu, M., Ni, R., Chen, L., Chen, N., Xu, K., Liu, D., Zhao, D., Zhao, T., and Qi, S.: On the local anthropogenic source diversities and transboundary transport for urban agglomeration ozone mitigation, *Atmospheric Environment*, 245, 118005, <https://doi.org/10.1016/j.atmosenv.2020.118005>, 2021.



Yang, J., Kang, S., Ji, Z., Yin, X., and Tripathee, L.: Investigating air pollutant concentrations, impact factors, and emission control strategies in western China by using a regional climate-chemistry model, *Chemosphere*, 246, 125767, <https://doi.org/10.1016/j.chemosphere.2019.125767>, 2020a.

Yang, J., Ji, Z., Kang, S., Zhang, Q., Chen, X., and Lee, S.-Y.: Spatiotemporal variations of air pollutants in western China and their relationship to meteorological factors and emission sources, *Environmental Pollution*, 254, 112952, <https://doi.org/10.1016/j.envpol.2019.07.120>, 2019a.

Yang, W., Chen, H., Wang, W., Wu, J., Li, J., Wang, Z., Zheng, J., and Chen, D.: Modeling study of ozone source apportionment over the Pearl River Delta in 2015, *Environmental Pollution*, 253, 393-402, <https://doi.org/10.1016/j.envpol.2019.06.091>, 2019b.

Yang, X., Cheng, S., Wang, G., Xu, R., Wang, X., Zhang, H., and Chen, G.: Characterization of volatile organic compounds and the impacts on the regional ozone at an international airport, *Environmental Pollution*, 238, 491-499, <https://doi.org/10.1016/j.envpol.2018.03.073>, 2018.

Yang, X., Wu, K., Lu, Y., Wang, S., Qiao, Y., Zhang, X., Wang, Y., Wang, H., Liu, Z., Liu, Y., and Lei, Y.: Origin of regional springtime ozone episodes in the Sichuan Basin, China: Role of synoptic forcing and regional transport, *Environmental Pollution*, 278, 116845, <https://doi.org/10.1016/j.envpol.2021.116845>, 2021a.

Yang, X., Wu, K., Wang, H., Liu, Y., Gu, S., Lu, Y., Zhang, X., Hu, Y., Ou, Y., Wang, S., and Wang, Z.: Summertime ozone pollution in Sichuan Basin, China: Meteorological conditions, sources and process analysis, *Atmospheric Environment*, 226, 117392, <https://doi.org/10.1016/j.atmosenv.2020.117392>, 2020b.

Yang, Y., Liao, H., and Li, J.: Impacts of the East Asian summer monsoon on interannual variations of summertime surface-layer ozone concentrations over China, *Atmospheric Chemistry and Physics*, 14, 6867-6879, <https://doi.org/10.5194/acp-14-6867-2014>, 2014.

Yang, Y., Zhao, Y., Zhang, L., Zhang, J., Huang, X., Zhao, X., Zhang, Y., Xi, M., and Lu, Y.: Improvement of the satellite-derived NO<sub>x</sub> emissions on air quality modeling and its effect on ozone and secondary inorganic aerosol formation in the Yangtze River Delta, China, *Atmos. Chem. Phys.*, 21, 1191-1209, <https://doi.org/10.5194/acp-21-1191-2021>, 2021b.

Yao, S., Wei, W., Cheng, S., Niu, Y., and Guan, P.: Impacts of Meteorology and Emissions on O<sub>3</sub> Pollution during 2013–2018 and Corresponding Control Strategy for a Typical Industrial City of China, *Atmosphere*, 12, 619, <https://doi.org/10.3390/atmos12050619>, 2021.

- Ye, L., Wang, X., Fan, S., Chen, W., Chang, M., Zhou, S., Wu, Z., and Fan, Q.: Photochemical indicators of ozone sensitivity: application in the Pearl River Delta, China, *Frontiers of Environmental Science & Engineering*, 10, 15, <https://doi.org/10.1007/s11783-016-0887-1>, 2016.
- Yin, H., Lu, X., Sun, Y., Li, K., Gao, M., Zheng, B., and Liu, C.: Unprecedented decline in summertime surface ozone over eastern China in 2020 comparably attributable to anthropogenic emission reductions and meteorology, *Environmental Research Letters*, 16, 124069, <https://doi.org/10.1088/1748-9326/ac3e22>, 2021.
- Yin, S., Huang, Z., Zheng, J., Huang, X., Chen, D., and Tan, H.: Characteristics of inorganic aerosol formation over ammonia-poor and ammonia-rich areas in the Pearl River Delta region, China, *Atmospheric Environment*, 177, 120-131, <https://doi.org/10.1016/j.atmosenv.2018.01.005>, 2018.
- You, Z., Zhu, Y., Jang, C., Wang, S., Gao, J., Lin, C.-J., Li, M., Zhu, Z., Wei, H., and Yang, W.: Response surface modeling-based source contribution analysis and VOC emission control policy assessment in a typical ozone-polluted urban Shunde, China, *Journal of Environmental Sciences*, 51, 294-304, <https://doi.org/10.1016/j.jes.2016.05.034>, 2017.
- Yu, M., Carmichael, G. R., Zhu, T., and Cheng, Y.: Sensitivity of predicted pollutant levels to urbanization in China, *Atmospheric Environment*, 60, 544-554, <https://doi.org/10.1016/j.atmosenv.2012.06.075>, 2012.
- Yu, M., Carmichael, G. R., Zhu, T., and Cheng, Y.: Sensitivity of predicted pollutant levels to anthropogenic heat emissions in Beijing, *Atmospheric Environment*, 89, 169-178, <https://doi.org/10.1016/j.atmosenv.2014.01.034>, 2014a.
- Yu, M., Zhu, Y., Lin, C.-J., Wang, S., Xing, J., Jang, C., Huang, J., Huang, J., Jin, J., and Yu, L.: Effects of air pollution control measures on air quality improvement in Guangzhou, China, *Journal of environmental management*, 244, 127-137, <https://doi.org/10.1016/j.jenvman.2019.05.046>, 2019.
- Yu, X., Yuan, Z., Fung, J. C. H., Xue, J., Li, Y., Zheng, J., and Lau, A. K. H.: Ozone changes in response to the heavy-duty diesel truck control in the Pearl River Delta, *Atmospheric Environment*, 88, 269-274, <https://doi.org/10.1016/j.atmosenv.2013.11.022>, 2014b.
- Zeren, Y., Guo, H., Lyu, X., Jiang, F., Wang, Y., Liu, X., Zeng, L., Li, M., and Li, L.: An Ozone “Pool” in South China: Investigations on Atmospheric Dynamics and Photochemical Processes Over the Pearl River Estuary, *Journal of Geophysical Research: Atmospheres*, 124, 12340-12355, <https://doi.org/10.1029/2019JD030833>, 2019.

Zhang, L., Zhu, B., Gao, J., and Kang, H.: Impact of Taihu Lake on city ozone in the Yangtze River Delta, *Advances in Atmospheric Sciences*, 34, 226-234, <https://doi.org/10.1007/s00376-016-6099-6>, 2017a.

Zhang, L., Li, Q., Wang, T., Ahmadov, R., Zhang, Q., Li, M., and Lv, M.: Combined impacts of nitrous acid and nitryl chloride on lower-tropospheric ozone: new module development in WRF-Chem and application to China, *Atmos. Chem. Phys.*, 17, 9733-9750, <https://doi.org/10.5194/acp-17-9733-2017>, 2017b.

Zhang, L., Jin, L., Zhao, T., Yin, Y., Zhu, B., Shan, Y., Guo, X., Tan, C., Gao, J., and Wang, H.: Diurnal variation of surface ozone in mountainous areas: Case study of Mt. Huang, East China, *Sci. Total Environ.*, 538, 583-590, <https://doi.org/10.1016/j.scitotenv.2015.08.096>, 2015.

Zhang, L., Zhao, T., Gong, S., Kong, S., Tang, L., Liu, D., Wang, Y., Jin, L., Shan, Y., Tan, C., Zhang, Y., and Guo, X.: Updated emission inventories of power plants in simulating air quality during haze periods over East China, *Atmos. Chem. Phys.*, 18, 2065-2079, <https://doi.org/10.5194/acp-18-2065-2018>, 2018.

Zhang, R., Sarwar, G., Fung, J. C. H., and Lau, A. K. H.: Role of photoexcited nitrogen dioxide chemistry on ozone formation and emission control strategy over the Pearl River Delta, China, *Atmospheric Research*, 132-133, 332-344, <https://doi.org/10.1016/j.atmosres.2013.06.001>, 2013.

Zhang, X., Yuan, C., and Zhuang, Z.: Exploring the Change in PM<sub>2.5</sub> and Ozone Concentrations Caused by Aerosol-Radiation Interactions and Aerosol-Cloud Interactions and the Relationship with Meteorological Factors, *Atmosphere*, 12, 1585, <https://doi.org/10.3390/atmos12121585>, 2021a.

Zhang, X., Fung, J. C. H., Lau, A. K. H., Zhang, S., and Huang, W.: Improved Modeling of Spatiotemporal Variations of Fine Particulate Matter Using a Three-Dimensional Variational Data Fusion Method, *Journal of Geophysical Research: Atmospheres*, 126, e2020JD033599, <https://doi.org/10.1029/2020JD033599>, 2021b.

Zhang, X., Feng, T., Zhao, S., Yang, G., Zhang, Q., Qin, G., Liu, L., Long, X., Sun, W., Gao, C., and Li, G.: Elucidating the impacts of rapid urban expansion on air quality in the Yangtze River Delta, China, *Sci. Total Environ.*, 799, 149426, <https://doi.org/10.1016/j.scitotenv.2021.149426>, 2021c.

Zhang, Y., Zhang, X., Wang, L., Zhang, Q., Duan, F., and He, K.: Application of WRF/Chem over East Asia: Part I. Model evaluation and intercomparison with MM5/CMAQ,

Atmospheric Environment, 124, 285-300, <https://doi.org/10.1016/j.atmosenv.2015.07.022>, 2016.

Zhang, Y., Zhao, Y., Li, J., Wu, Q., Wang, H., Du, H., Yang, W., Wang, Z., and Zhu, L.: Modeling Ozone Source Apportionment and Performing Sensitivity Analysis in Summer on the North China Plain, *Atmosphere*, 11, 992, <https://doi.org/10.3390/atmos11090992>, 2020.

Zhang, Y., Liu, J., Tao, W., Xiang, S., Liu, H., Yi, K., Yang, H., Xu, J., Wang, Y., Ma, J., Wang, X., Hu, J., Wan, Y., Wang, X., and Tao, S.: Impacts of chlorine emissions on secondary pollutants in China, *Atmospheric Environment*, 246, 118177, <https://doi.org/10.1016/j.atmosenv.2020.118177>, 2021d.

Zhao, K., Luo, H., Yuan, Z., Xu, D., Du, Y., Zhang, S., Hao, Y., Wu, Y., Huang, J., Wang, Y., and Jiang, R.: Identification of close relationship between atmospheric oxidation and ozone formation regimes in a photochemically active region, *Journal of Environmental Sciences*, 102, 373-383, <https://doi.org/10.1016/j.jes.2020.09.038>, 2021a.

Zhao, N., Wang, G., Li, G., and Lang, J.: Trends in Air Pollutant Concentrations and the Impact of Meteorology in Shandong Province, Coastal China, during 2013-2019, *Aerosol and Air Quality Research*, 21, <https://doi.org/10.4209/aaqr.200545>, 2021b.

Zhao, Y., Mao, P., Zhou, Y., Yang, Y., Zhang, J., Wang, S., Dong, Y., Xie, F., Yu, Y., and Li, W.: Improved provincial emission inventory and speciation profiles of anthropogenic non-methane volatile organic compounds: a case study for Jiangsu, China, *Atmos. Chem. Phys.*, 17, 7733-7756, <https://doi.org/10.5194/acp-17-7733-2017>, 2017.

Zhao, Y., Zhang, J., and Nielsen, C. P.: The effects of recent control policies on trends in emissions of anthropogenic atmospheric pollutants and CO<sub>2</sub> in China, *Atmos. Chem. Phys.*, 13, 487-508, <https://doi.org/10.5194/acp-13-487-2013>, 2013.

Zhao, Y., Nielsen, C. P., Lei, Y., McElroy, M. B., and Hao, J.: Quantifying the uncertainties of a bottom-up emission inventory of anthropogenic atmospheric pollutants in China, *Atmos. Chem. Phys.*, 11, 2295-2308, <https://doi.org/10.5194/acp-11-2295-2011>, 2011.

Zheng, B., Cheng, J., Geng, G., Wang, X., Li, M., Shi, Q., Qi, J., Lei, Y., Zhang, Q., and He, K.: Mapping anthropogenic emissions in China at 1 km spatial resolution and its application in air quality modeling, *Science Bulletin*, 66, 612-620, <https://doi.org/10.1016/j.scib.2020.12.008>, 2021.

Zheng, H., Cai, S., Wang, S., Zhao, B., Chang, X., and Hao, J.: Development of a unit-based industrial emission inventory in the Beijing–Tianjin–Hebei region and resulting improvement

in air quality modeling, *Atmos. Chem. Phys.*, 19, 3447-3462, <https://doi.org/10.5194/acp-19-3447-2019>, 2019.

Zheng, Y., Jiang, F., Feng, S., Cai, Z., Shen, Y., Ying, C., Wang, X., and Liu, Q.: Long-range transport of ozone across the eastern China seas: A case study in coastal cities in southeastern China, *Sci. Total Environ.*, 768, 144520, <https://doi.org/10.1016/j.scitotenv.2020.144520>, 2021.

Zhou, G., Xu, J., Xie, Y., Chang, L., Gao, W., Gu, Y., and Zhou, J.: Numerical air quality forecasting over eastern China: An operational application of WRF-Chem, *Atmospheric Environment*, 153, 94-108, <https://doi.org/10.1016/j.atmosenv.2017.01.020>, 2017a.

Zhou, Y., Fu, J. S., Zhuang, G., and Levy, J. I.: Risk-Based Prioritization among Air Pollution Control Strategies in the Yangtze River Delta, China, *Environmental Health Perspectives*, 118, 1204-1210, <https://doi.org/10.1289/ehp.1001991>, 2010.

Zhou, Y., Zhao, Y., Mao, P., Zhang, Q., Zhang, J., Qiu, L., and Yang, Y.: Development of a high-resolution emission inventory and its evaluation and application through air quality modeling for Jiangsu Province, China, *Atmos. Chem. Phys.*, 17, 211-233, <https://doi.org/10.5194/acp-17-211-2017>, 2017b.

Zhu, J. and Liao, H.: Future ozone air quality and radiative forcing over China owing to future changes in emissions under the Representative Concentration Pathways (RCPs), *Journal of Geophysical Research: Atmospheres*, 121, 1978-2001, <https://doi.org/10.1002/2015JD023926>, 2016.
