# Supplementary material for: Recommendations on benchmarks for chemical transport model applications in China – Part 2: Ozone and Uncertainty Analysis
Source: Copernicus journal article supplement (doi:10.5194/egusphere-2024-2199), 2024-09-02
Supplement: Supplementary file [file egusphere-2024-2199-AC1-supplement.pdf]

## Referee#1

Huang et al. present part 2 on proposing benchmarks for CTM applications in simulating ozone in China. The evaluation criteria is based off prior work by Emery et al. (2017) which may be tailored to the U.S. and Europe and not suitable for China, and the authors propose revised criteria and methodology for simulations focusing on China. The work is generally well written, though I have major concerns regarding some areas for the manuscript which need to be clarified prior to recommending this work for publication.

Response: We appreciate the constructive comments and suggestions. All comments have been carefully considered and addressed in the revised manuscript. The changes made to the main text and supplementary information file are highlighted in yellow. Below is our point-by-point response to each comment, with our responses marked in blue.

Major comments:

1. L59: "... which may not be suitable for China." Could the authors elaborate on why Emery et al.'s criteria are not suitable and the steps the authors propose for revising them? Is it the range of simulated/observed values in China different from other regions? Differences in the chemical regimes controlling ozone in China? Differences in the input data uncertainty? Differences in model tuning targeting different regions?

Response: The reviewer raises a good question regarding the motivation of the study. Several factors necessitate the establishment of a tailored benchmark for model applications specific to China.

First and foremost, ozone concentrations in China are considerably higher than those observed in the United States and have been on a consistent upward trend since 2013, as indicated in the "China Blue Book for the Prevention and Control of Atmospheric Ozone Pollution" (Figure 1, adopted from Zhang et al. 2020). The fourth highest maximum daily 8-hour average (4<sup>th</sup> MDA8) ozone concentration across 74 major cities in China rose from 189  $\mu\text{g}/\text{m}^3$  (~95 ppb) in 2013 to 236  $\mu\text{g}/\text{m}^3$  (~118 ppb) in 2019. In contrast, the 4<sup>th</sup> MDA8 levels in the United States were recorded at or below 150  $\mu\text{g}/\text{m}^3$  (~75 ppb) during 2013-2018 (Table 1). A comparative analysis of the 4<sup>th</sup> MDA8 and the 90<sup>th</sup> percentile maximum daily 8-hour average (MDA8) ozone concentrations between these 74 Chinese cities from 2013 to 2018 and the United States, which has maintained 1,151 operational ozone monitoring sites since 2010, reveals that both ozone pollution indicators in China are significantly elevated relative to those in the United States. Moreover, while the ozone pollution indicators in China

exhibit an annual increase, the United States has demonstrated overall stability in these metrics. The ozone pollution levels in the 74 cities of China from 2015 to 2019 were comparable to those in the U.S. during the late 1980s, when 196 ozone monitoring sites were in operation since 1980.

Table 1 The 4<sup>th</sup> MDA8 and 90<sup>th</sup> percentile MDA8 in 74 Cities of China and 1151 Sites across the United States (2013–2019) (unit:  $\mu\text{g}/\text{m}^3$ , adopted from China Blue Book for the Prevention and Control of Atmospheric Ozone Pollution 2020)

| Statistical methods | Region             | 2013 | 2014 | 2015 | 2016 | 2017 | 2018 | 2019 |
|---------------------|--------------------|------|------|------|------|------|------|------|
| Fourth-highest MDA8 | 74 cities in China | 189  | 201  | 204  | 204  | 227  | 222  | 236  |
|                     | US                 | 142  | 141  | 143  | 144  | 143  | 145  | —    |
| MDA8-90             | 74 cities in China | 139  | 145  | 150  | 154  | 167  | 168  | 181  |
|                     | US                 | 122  | 121  | 123  | 122  | 121  | 122  | —    |

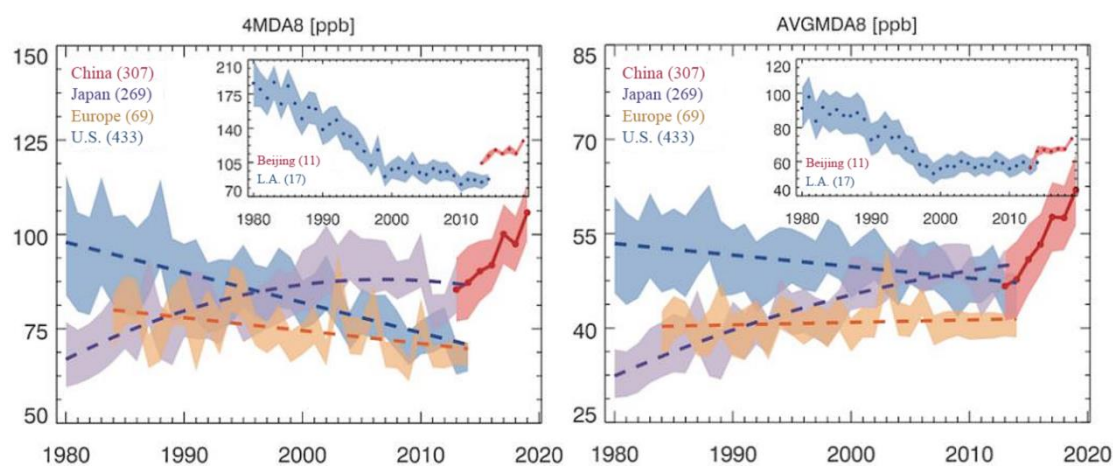

Figure 1 Evolution of urban surface ozone levels in China (red), Japan (purple), Europe (orange), and the United States (blue) from 1980 to 2019 (adopted from Zhang et al. 2020)

Secondly, the contribution of background ozone demonstrates different trends between China and other regions (China Blue Book for the Prevention and Control of Atmospheric Ozone Pollution 2020). According to atmospheric background monitoring data from the World Meteorological Organization, tropospheric ozone background concentrations in the Northern Hemisphere remained relatively stable from 2013 to 2019. Conversely, the background concentration of ozone in China has shown a year-on-year increase, particularly pronounced in urban areas.

Thirdly, the mechanisms underlying ozone formation may differ between China and the United States. However, a direct comparison of these formation regimes proves

challenging, as both countries encompass vast regions with distinct ozone dynamics. Research conducted by Jung et al. (2022) identified notable shifts in the western United States from a NO<sub>x</sub>-saturated regime to a transition regime (or from a transition regime to a NO<sub>x</sub>-limited regime), while rural areas, especially in the eastern and southeastern United States, have become increasingly sensitive to VOC emissions. In China, VOC-limited regimes were predominantly observed in the Beijing-Tianjin-Hebei (BTH), Yangtze River Delta (YRD), and Guangdong (GD) regions in 2013 (Zhang et al., 2024). By 2019, a significant transition was noted in the BTH areas from VOC-limited to transition regimes, which was accompanied by a reduction in VOC-limited areas within the YRD and GD.

In summary, the disparities in ozone concentrations, background contributions, and formation mechanisms underscore the necessity for a customized benchmark for model applications in China. Such a benchmark is essential for appropriately addressing the unique challenges posed by ozone pollution within the country.

We have added above descriptions in “1. Introduction” of the revised manuscript (L58-L78):

*“Several key factors necessitate the establishment of a tailored benchmark for model applications specific to China. Firstly, ozone concentrations in China have been significantly higher than those in the U.S. and have shown a consistent upward trend (Zhang et al. 2020). For instance, the fourth highest maximum daily 8-hour average (4MDA8) ozone concentration across 74 major cities in China increased from 189  $\mu\text{g}/\text{m}^3$  ( $\sim 95$  ppb) in 2013 to 236  $\mu\text{g}/\text{m}^3$  in 2019 ( $\sim 118$  ppb), compared to levels at or below 150  $\mu\text{g}/\text{m}^3$  ( $\sim 75$  ppb) in the U.S. during the same period (Table S1). Secondly, background ozone contributions exhibit different trends between China and other regions, with China experiencing a year-on-year increase, especially in urban areas (Zhang et al. 2020). Thirdly, the mechanisms of ozone formation may differ between China and the U.S. However, a direct comparison of these formation regimes proves challenging, as both countries encompass vast regions with distinct ozone dynamics. Jung et al. (2022) identified notable shifts in the western U.S. from a NO<sub>x</sub>-saturated regime to a transition regime (or from a transition regime to a NO<sub>x</sub>-limited regime), while rural areas, especially in the eastern and southeastern U.S., have become increasingly sensitive to VOC emissions. In China, VOC-limited regimes were predominantly observed in the Beijing-Tianjin-Hebei (BTH), Yangtze River Delta (YRD), and Guangdong (GD) regions in 2013 (Zhang et al., 2024) whereas in 2019 a significant transition was noted in the BTH areas from VOC-limited to transition*

*regimes, which was accompanied by a reduction in VOC-limited areas within the YRD and GD. These disparities in ozone concentrations, background contributions, and formation mechanisms underscore the necessity for a customized benchmark for model applications in China, which is essential for appropriately addressing the unique challenges posed by ozone pollution within the country. Therefore, the increasing prevalence of CTM applications in China necessitates specific CTM benchmarks tailored to this region.”*

2. L79 and Figure 1 pose "WRF-Chem" as a single model, which is not very accurate. WRF-Chem provides an extremely large amount of chemical schemes available (e.g., refer to User's Guide <https://repository.library.noaa.gov/view/noaa/14945> Page 14-) ranging from simple RADM2 without aerosols with a dozen species to the MOZART chemical mechanism with hundreds of species, not to mention the different configurations of aerosols, photolysis, and underlying meteorology simulated by WRF. Different papers using different schemes of WRF-Chem are not comparable to each other. Fortunately, the authors do separate the studies by chemical mechanism later in the text (in "Choice of gas-phase chemical mechanism") - I would suggest that this separation is done earlier in the text and in Figure 1 to make it clear that individual chemical mechanisms available in WRF-Chem are evaluated separately and not grouped together. I would request that the supplement data in Table S1 be updated similarly to reflect the chemical mechanism in the WRF-Chem studies.

Response: We acknowledge the reviewer's observation regarding the diverse chemical mechanisms offered by WRF-Chem. Figure 1 and Table S1 (now Table S2) have been modified accordingly to include the information on chemical mechanism utilized by each model application. We have also included clarifications in Section 2.1 regarding the various chemical mechanisms utilized by WRF-Chem to avoid any potential confusion (L106-L108):

*“Different configurations could be used even within the same model. For example, WRF-Chem provides different chemical mechanisms, ranging from simple RADM2 without aerosols to the MOZART chemical mechanism with hundreds of species.”*

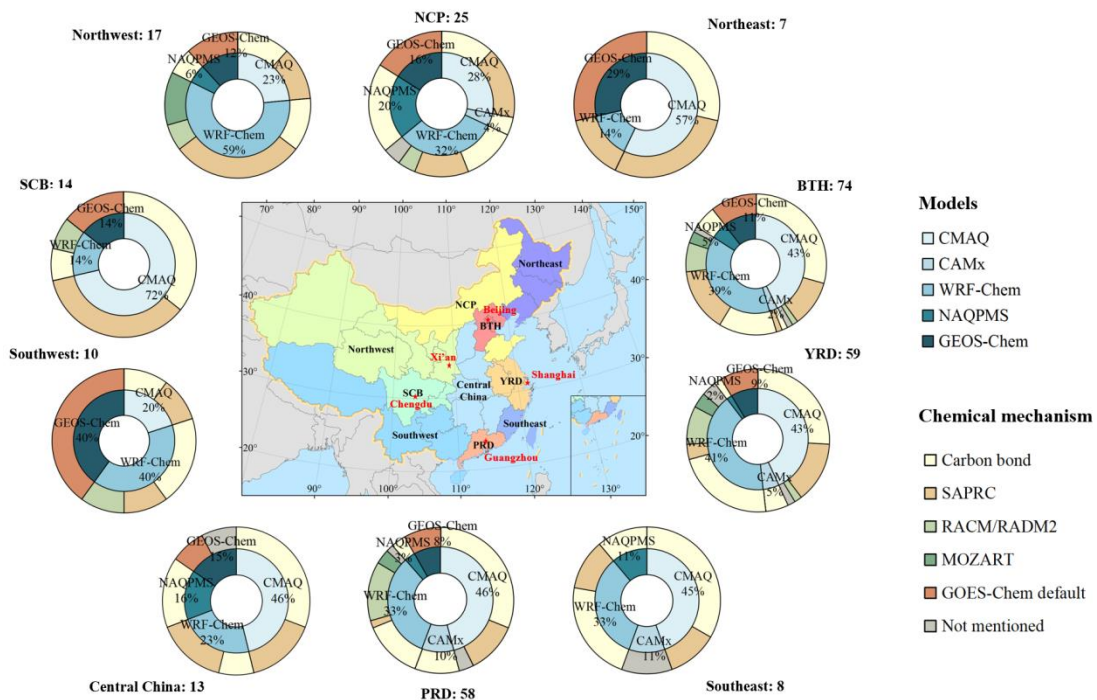

**Figure 1** CMAQ modeling domain with definitions of regions used in this study. The surrounding pie charts display the total number of studies for each region (excluding studies for the entire China) and the percentage of different CTMs used. Red stars represent the five cities selected in uncertainty analysis.

3. P92 - the authors convert mixing ratios to  $\mu\text{g}/\text{m}^3$  in the analysis. I understand this may be for consistency with the Chinese MEE observational data which is reported in  $\mu\text{g}/\text{m}^3$ . I recall that there may be a temperature / pressure condition used by China MEE for use in the unit conversion to/from  $\mu\text{g}/\text{m}^3$  - can the authors confirm that 273.15K at 101.325 kPa is the one used (and possibly provide a reference)? This would affect the model to obs. comparisons and should be clarified.

Response: Thanks for pointing this out. The conversion factor of 2.14 between ppb and  $\mu\text{g}/\text{m}^3$  is derived with an ambient temperature of 273K and a pressure of 101.325kPa, which is referred as the “standard state” in the Chinese Ambient Air Quality Standards (GB3095-2012,

[https://www.mee.gov.cn/ywgz/fgbz/bz/bzwb/dqhjbh/dqhjzlbz/201203/t20120302\\_224165.htm](https://www.mee.gov.cn/ywgz/fgbz/bz/bzwb/dqhjbh/dqhjzlbz/201203/t20120302_224165.htm), accessed on Dec. 8, 2024). It should be noted that we utilized this conversion factor only for the model performance metrics expressed in absolute concentrations, for example, mean bias (MB), to ensure consistent comparisons across different studies. The decision regarding whether to present the comparison between model outputs and observational data in ppb or  $\mu\text{g}/\text{m}^3$ , as well as the choice of conversion factor, rests with the authors of the respective studies. We have added clarifications in Section 2.1 of the revised manuscript (L110-L113).

*“For consistency, we converted O<sub>3</sub> concentrations (for example, mean bias, root*

*mean square error) expressed in parts per billion by volume (ppbv) to  $\mu\text{g}/\text{m}^3$  using a factor of 2.14. This factor of 2.14 refers to the “standard state”, i.e., an ambient air temperature of 273.15 K at 101.325 kPa, defined by the Chinese Ambient air quality standards (GB 3095—2012, MEE, 2016).”*

4. L122 - "a uniform O<sub>3</sub> concentration of 29 ppb was used as the initial and boundary conditions (BCs)". I have three questions here:

4.1. I assume 29 ppb is at the surface and there is a vertical profile applied to this? What does the vertical profile look like?

Response: The ozone vertical profile is constant, i.e. 29 ppb. This is the default boundary condition file that EPA provides for CMAQ (<https://github.com/USEPA/CMAQ/tree/main/PREP/bcon/src/profile>, accessed on Dec.8, 2024).

4.2. A 10-day spin-up from uniform initial conditions (and not previously spun-up distributions) of 29 ppb for simulating ozone seems very short. How was this chosen? That is shorter than the mean tropospheric lifetime of ozone (although it may be fine for the PBL) but I have concerns about the effects this may have for free tropospheric ozone and influences from that which may be important for East Asia.

Response: The spin-up period needed for a limited-area photochemical model is not so much dependent on atmospheric lifetime, but rather the time required for atmospheric transport to flush the initial air mass fully out of the domain. This could range from a single day for small urban-centered domains, to a month for continental domains. Among the CMAQ-related articles we reviewed, 58 out of 90 specified their spin-up periods, among which 95% (55 studies) applied a spin-up period less or equal to 10 days (19 studies  $\leq$  5 days, 36 studies between 5-10 days). Only 3 studies applied a spin-up period more than 10 days. Thus a spin-up of 10 days seems to be a common practice and was therefore adopted in our study. We agree with the reviewer that a longer spin-up period would help reduce the impact of uncertainties associated with the initial conditions, especially if a uniform ozone distribution is specified. We added this point in one of our recommendations in a new Section “3.5 Recommendations for Future Modeling Practices” (see also responses to other comments) (L441-L445):

*“4. The majority of model applications reviewed in this study applies a spin-up period of less than or equal to 10 days. However, studies (Hogrefe et al. 2017; Karamachandani et al. 2017) have shown that a commonly used spin-up period of ten days (or a week) might not be sufficient to reduce the effects of initial conditions to less than 1%. Thus, a longer spin-up period, preferably 20 days depending on domain*

*size, is recommended to mitigate the influence of initial conditions.”*

4.3. Can the authors confirm that a uniform 29 ppb is used as the boundary conditions? For regional CTMs the transport from outside the domain, which ventilates the simulated region from the boundary conditions, can be quite important for the ozone distribution inside the simulated domain. Why were "realistic" boundary conditions from a global model not used here?

Response: A spatially and temporally uniform ozone concentration of 29 ppb was used to define the initial and boundary conditions in the CMAQ sensitivity simulations conducted in this study. We agree with the reviewer that this is a simplistic assumption and the impact of boundary conditions within the domain can be substantial for ozone. Among the CMAQ application studies collected, 54 of 90 describe the configuration of the initial and boundary conditions while the remaining studies provide no information. Of the 54 papers that do, 65% (35 papers) applied the CMAQ default (i.e. 29 ppb) values. Thus, we decided to apply CMAQ with the default configuration. Our purpose for the ozone uncertainty analysis was to quantify how variability in boundary conditions affect simulated ozone concentrations, and so our approach to mirror how many other studies in China have applied CMAQ is logical given that context. Our results show that boundary condition uncertainty is not especially important for the highest ozone levels that occur throughout the majority of heavily urbanized areas of eastern China. We have added clarifications in the revised manuscript in Section 2.3 (L143-L149):

*“The use of a spatially and temporally uniform ozone concentration is a rather simplistic assumption and as we illustrate later the impact of boundary conditions within the domain can range from substantial to minimally impactful. Among the CMAQ application studies collected, 54 of 90 describe the configuration of the initial and boundary conditions and 35 of those applied the CMAQ default profile. Since our purpose for the ozone uncertainty analysis was to quantify how variability in boundary conditions affect simulated ozone concentrations throughout China, we elected to mirror how many of the studies have applied CMAQ.”*

5. L209... Impact of grid spacing. I would suggest "horizontal resolution" here. The authors claim in L219 that "no clear trend was evident to indicate better model performances as grid spacing decreases." I understand there's further discussion later in this section but this statement is potentially misleading when unqualified without mentioning that it is not controlled for the same model, the same emissions, input data, etc... The authors state at the end of the section that "reducing grid spacing does

not necessarily lead to improved model performance if the input data resolution (i.e., spatial resolution of the emissions) is not correspondingly high or well-matched." In my opinion, such an argument is better phrased as a caution to model configuration instead of a conclusion - if flawed model configurations where the input data resolution is insufficient for the model resolution are analyzed, I would argue it is evident that improved model resolution may not provide the benefits modelers are looking for. At first glance the authors are close to presenting a "dangerous" argument that model resolution provides no benefits then later saying only if the model is configured incorrectly!

Response: Thanks for the nice comment. We have changed "grid spacing" to "horizontal resolution" throughout the manuscript.

Regarding the comment to present as a caution instead of a conclusion, we revised the previous statement as follows:

L247-L248:

*"Figure 6 shows the distribution of eight statistical indicators by different horizontal resolutions while ignoring the differences in other model configurations."*

L257-L260:

*"Therefore, modelers should exercise caution and avoid optimism when configuring their model at finer resolutions as reducing horizontal resolution does not necessarily lead to improved model performance if the input data resolution (i.e., horizontal resolution of the emissions) is insufficient for the model's resolution."*

Specific comments:

- L78: GEOS-Chem is not an acronym - see <https://geoschem.github.io/narrative.html>.

Response: Corrected in the revised manuscript.

-L115: delete "grid". What is the model top height?

Response: Deleted in the revised manuscript. The top of the model goes to 10 hPa.

This point is added in the revised manuscript.

- L116: What are the other configuration parameters of the WRF simulation providing the meteorology? e.g., PBL scheme, ...

Response: Configurations of the WRF model are added in Table S6.

- L119: Link for EDGAR is wrong, [www.meicmodel.org](http://www.meicmodel.org) is written here.

Response: Corrected in the revised manuscript.

- L192: Would be helpful to define BTH, YRD, and PRD here for readers unfamiliar with the region terminology.

Response: Added in the revised manuscript.

- L212 "i.e. GEOS-Chem" - GEOS-Chem can be used regionally. Many studies use



GEOS-Chem nested for China dating back to Y.X. Wang et al. (2004).

Response: Thanks for pointing this out. We changed “i.e. GEOS-Chem” to “i.e. GEOS-Chem applications at global scale)” to avoid confusion (L238-L240):

*“Generally, a coarse horizontal resolution (> 50 km) is utilized for global simulations (i.e. GEOS-Chem applications at global scale), while a finer horizontal resolution (< 4km) with nested grids is preferred for regional or city-scale modelling.”*

## References

Jung, J., Choi, Y., Mousavinezhad, S., Kang, D., Park, J., Pouyaei, A., ... & Kim, H. (2022). Changes in the ozone chemical regime over the contiguous United States inferred by the inversion of NO<sub>x</sub> and VOC emissions using satellite observation. *Atmospheric research*, 270, 106076.

Zhang, J., Shen, A., Jin, Y., Cui, Y., Xu, Y., Lu, X., ... & Fan, Q. (2024). Evolution of ozone formation regimes during different periods in representative regions of China. *Atmospheric Environment*, 338, 120830.

Zhang, Y., Zheng, J., Chen, C., et al.: China Blue Book for the Prevention and Control of Atmospheric Ozone Pollution, Science Press, China, ISBN 9787030716644, 2020
